# Supplementary material for: Differential expression of miRNAs revealed by small RNA sequencing in traumatic tracheal stenosis
Source: Front Genet. 2024 Jan 8;14:1291488. doi: 10.3389/fgene.2023.1291488 (PMC10800880; doi:10.3389/fgene.2023.1291488)
Supplement: Supplementary file 1 [file Table2.XLSX]

## Sheet: TableS2
TableS2 Target genes of the differental miRNAs
miRNA	gene
hsa-miR-134-5p	ENSG00000003249
hsa-miR-134-5p	ENSG00000005700
hsa-miR-134-5p	ENSG00000005844
hsa-miR-134-5p	ENSG00000007168
hsa-miR-134-5p	ENSG00000007952
hsa-miR-134-5p	ENSG00000008517
hsa-miR-134-5p	ENSG00000010610
hsa-miR-134-5p	ENSG00000015475
hsa-miR-134-5p	ENSG00000043143
hsa-miR-134-5p	ENSG00000044115
hsa-miR-134-5p	ENSG00000047579
hsa-miR-134-5p	ENSG00000048140
hsa-miR-134-5p	ENSG00000054983
hsa-miR-134-5p	ENSG00000059122
hsa-miR-134-5p	ENSG00000064309
hsa-miR-134-5p	ENSG00000064687
hsa-miR-134-5p	ENSG00000073584
hsa-miR-134-5p	ENSG00000073756
hsa-miR-134-5p	ENSG00000075702
hsa-miR-134-5p	ENSG00000076344
hsa-miR-134-5p	ENSG00000080824
hsa-miR-134-5p	ENSG00000087258
hsa-miR-134-5p	ENSG00000091137
hsa-miR-134-5p	ENSG00000092931
hsa-miR-134-5p	ENSG00000095585
hsa-miR-134-5p	ENSG00000099338
hsa-miR-134-5p	ENSG00000099949
hsa-miR-134-5p	ENSG00000099954
hsa-miR-134-5p	ENSG00000099956
hsa-miR-134-5p	ENSG00000100319
hsa-miR-134-5p	ENSG00000100413
hsa-miR-134-5p	ENSG00000101182
hsa-miR-134-5p	ENSG00000101441
hsa-miR-134-5p	ENSG00000101473
hsa-miR-134-5p	ENSG00000102312
hsa-miR-134-5p	ENSG00000102897
hsa-miR-134-5p	ENSG00000103723
hsa-miR-134-5p	ENSG00000104140
hsa-miR-134-5p	ENSG00000105219
hsa-miR-134-5p	ENSG00000105298
hsa-miR-134-5p	ENSG00000105676
hsa-miR-134-5p	ENSG00000105737
hsa-miR-134-5p	ENSG00000106976
hsa-miR-134-5p	ENSG00000108179
hsa-miR-134-5p	ENSG00000108433
hsa-miR-134-5p	ENSG00000108591
hsa-miR-134-5p	ENSG00000108679
hsa-miR-134-5p	ENSG00000108798
hsa-miR-134-5p	ENSG00000108852
hsa-miR-134-5p	ENSG00000109911
hsa-miR-134-5p	ENSG00000111305
hsa-miR-134-5p	ENSG00000114126
hsa-miR-134-5p	ENSG00000115355
hsa-miR-134-5p	ENSG00000115486
hsa-miR-134-5p	ENSG00000115648
hsa-miR-134-5p	ENSG00000115685
hsa-miR-134-5p	ENSG00000115806
hsa-miR-134-5p	ENSG00000117877
hsa-miR-134-5p	ENSG00000119681
hsa-miR-134-5p	ENSG00000119689
hsa-miR-134-5p	ENSG00000119929
hsa-miR-134-5p	ENSG00000122218
hsa-miR-134-5p	ENSG00000123485
hsa-miR-134-5p	ENSG00000124074
hsa-miR-134-5p	ENSG00000124092
hsa-miR-134-5p	ENSG00000126247
hsa-miR-134-5p	ENSG00000127603
hsa-miR-134-5p	ENSG00000127663
hsa-miR-134-5p	ENSG00000128271
hsa-miR-134-5p	ENSG00000128596
hsa-miR-134-5p	ENSG00000130165
hsa-miR-134-5p	ENSG00000130305
hsa-miR-134-5p	ENSG00000130640
hsa-miR-134-5p	ENSG00000131089
hsa-miR-134-5p	ENSG00000131746
hsa-miR-134-5p	ENSG00000132746
hsa-miR-134-5p	ENSG00000132768
hsa-miR-134-5p	ENSG00000134121
hsa-miR-134-5p	ENSG00000135899
hsa-miR-134-5p	ENSG00000137166
hsa-miR-134-5p	ENSG00000137474
hsa-miR-134-5p	ENSG00000138346
hsa-miR-134-5p	ENSG00000138622
hsa-miR-134-5p	ENSG00000139219
hsa-miR-134-5p	ENSG00000140025
hsa-miR-134-5p	ENSG00000140553
hsa-miR-134-5p	ENSG00000140740
hsa-miR-134-5p	ENSG00000143125
hsa-miR-134-5p	ENSG00000143851
hsa-miR-134-5p	ENSG00000144230
hsa-miR-134-5p	ENSG00000144589
hsa-miR-134-5p	ENSG00000145014
hsa-miR-134-5p	ENSG00000145687
hsa-miR-134-5p	ENSG00000147383
hsa-miR-134-5p	ENSG00000147889
hsa-miR-134-5p	ENSG00000149929
hsa-miR-134-5p	ENSG00000149930
hsa-miR-134-5p	ENSG00000150455
hsa-miR-134-5p	ENSG00000153208
hsa-miR-134-5p	ENSG00000153815
hsa-miR-134-5p	ENSG00000156650
hsa-miR-134-5p	ENSG00000158516
hsa-miR-134-5p	ENSG00000159884
hsa-miR-134-5p	ENSG00000160221
hsa-miR-134-5p	ENSG00000160360
hsa-miR-134-5p	ENSG00000160401
hsa-miR-134-5p	ENSG00000160789
hsa-miR-134-5p	ENSG00000160973
hsa-miR-134-5p	ENSG00000162552
hsa-miR-134-5p	ENSG00000162971
hsa-miR-134-5p	ENSG00000163482
hsa-miR-134-5p	ENSG00000163803
hsa-miR-134-5p	ENSG00000164107
hsa-miR-134-5p	ENSG00000164488
hsa-miR-134-5p	ENSG00000164520
hsa-miR-134-5p	ENSG00000164591
hsa-miR-134-5p	ENSG00000165583
hsa-miR-134-5p	ENSG00000166682
hsa-miR-134-5p	ENSG00000166704
hsa-miR-134-5p	ENSG00000167600
hsa-miR-134-5p	ENSG00000167654
hsa-miR-134-5p	ENSG00000167772
hsa-miR-134-5p	ENSG00000168137
hsa-miR-134-5p	ENSG00000168172
hsa-miR-134-5p	ENSG00000168447
hsa-miR-134-5p	ENSG00000168748
hsa-miR-134-5p	ENSG00000168872
hsa-miR-134-5p	ENSG00000169118
hsa-miR-134-5p	ENSG00000169752
hsa-miR-134-5p	ENSG00000169972
hsa-miR-134-5p	ENSG00000170638
hsa-miR-134-5p	ENSG00000170955
hsa-miR-134-5p	ENSG00000172890
hsa-miR-134-5p	ENSG00000172893
hsa-miR-134-5p	ENSG00000172927
hsa-miR-134-5p	ENSG00000172987
hsa-miR-134-5p	ENSG00000173218
hsa-miR-134-5p	ENSG00000173706
hsa-miR-134-5p	ENSG00000173714
hsa-miR-134-5p	ENSG00000173812
hsa-miR-134-5p	ENSG00000174446
hsa-miR-134-5p	ENSG00000174483
hsa-miR-134-5p	ENSG00000175325
hsa-miR-134-5p	ENSG00000175920
hsa-miR-134-5p	ENSG00000176340
hsa-miR-134-5p	ENSG00000177728
hsa-miR-134-5p	ENSG00000178188
hsa-miR-134-5p	ENSG00000179142
hsa-miR-134-5p	ENSG00000179292
hsa-miR-134-5p	ENSG00000181143
hsa-miR-134-5p	ENSG00000183873
hsa-miR-134-5p	ENSG00000184110
hsa-miR-134-5p	ENSG00000184144
hsa-miR-134-5p	ENSG00000184363
hsa-miR-134-5p	ENSG00000184428
hsa-miR-134-5p	ENSG00000185100
hsa-miR-134-5p	ENSG00000185640
hsa-miR-134-5p	ENSG00000185721
hsa-miR-134-5p	ENSG00000185730
hsa-miR-134-5p	ENSG00000185829
hsa-miR-134-5p	ENSG00000186442
hsa-miR-134-5p	ENSG00000186472
hsa-miR-134-5p	ENSG00000186517
hsa-miR-134-5p	ENSG00000187242
hsa-miR-134-5p	ENSG00000187624
hsa-miR-134-5p	ENSG00000187650
hsa-miR-134-5p	ENSG00000187754
hsa-miR-134-5p	ENSG00000188566
hsa-miR-134-5p	ENSG00000189410
hsa-miR-134-5p	ENSG00000196911
hsa-miR-134-5p	ENSG00000197446
hsa-miR-134-5p	ENSG00000197584
hsa-miR-134-5p	ENSG00000197694
hsa-miR-134-5p	ENSG00000198336
hsa-miR-134-5p	ENSG00000198758
hsa-miR-134-5p	ENSG00000198964
hsa-miR-134-5p	ENSG00000204195
hsa-miR-134-5p	ENSG00000205726
hsa-miR-134-5p	ENSG00000213593
hsa-miR-134-5p	ENSG00000213822
hsa-miR-134-5p	ENSG00000213930
hsa-miR-134-5p	ENSG00000214946
hsa-miR-134-5p	ENSG00000215217
hsa-miR-134-5p	ENSG00000223572
hsa-miR-134-5p	ENSG00000228696
hsa-miR-134-5p	ENSG00000233436
hsa-miR-134-5p	ENSG00000242802
hsa-miR-134-5p	ENSG00000254445
hsa-miR-134-5p	ENSG00000254709
hsa-miR-134-5p	ENSG00000258555
hsa-miR-134-5p	ENSG00000265118
hsa-miR-134-5p	ENSG00000268447
hsa-miR-134-5p	ENSG00000268655
hsa-miR-134-5p	ENSG00000268994
hsa-miR-134-5p	ENSG00000269547
hsa-miR-134-5p	ENSG00000272305
hsa-miR-134-5p	ENSG00000275520
hsa-miR-134-5p	ENSG00000277117
hsa-miR-134-5p	ENSG00000278259
hsa-miR-134-5p	ENSG00000278540
hsa-miR-134-5p	ENSG00000281106
hsa-miR-134-5p	ENSG00000281938
hsa-miR-134-5p	ENSG00000283663
hsa-miR-134-5p	ENSG00000284753
hsa-miR-141-3p	ENSG00000031823
hsa-miR-141-3p	ENSG00000040199
hsa-miR-141-3p	ENSG00000068784
hsa-miR-141-3p	ENSG00000086504
hsa-miR-141-3p	ENSG00000087263
hsa-miR-141-3p	ENSG00000090621
hsa-miR-141-3p	ENSG00000100578
hsa-miR-141-3p	ENSG00000101294
hsa-miR-141-3p	ENSG00000101958
hsa-miR-141-3p	ENSG00000103047
hsa-miR-141-3p	ENSG00000105383
hsa-miR-141-3p	ENSG00000105397
hsa-miR-141-3p	ENSG00000111783
hsa-miR-141-3p	ENSG00000118271
hsa-miR-141-3p	ENSG00000128513
hsa-miR-141-3p	ENSG00000131828
hsa-miR-141-3p	ENSG00000134996
hsa-miR-141-3p	ENSG00000137841
hsa-miR-141-3p	ENSG00000149124
hsa-miR-141-3p	ENSG00000158941
hsa-miR-141-3p	ENSG00000162711
hsa-miR-141-3p	ENSG00000164270
hsa-miR-141-3p	ENSG00000165699
hsa-miR-141-3p	ENSG00000166111
hsa-miR-141-3p	ENSG00000166912
hsa-miR-141-3p	ENSG00000167553
hsa-miR-141-3p	ENSG00000171163
hsa-miR-141-3p	ENSG00000180957
hsa-miR-141-3p	ENSG00000188690
hsa-miR-141-3p	ENSG00000203727
hsa-miR-141-3p	ENSG00000213215
hsa-miR-141-3p	ENSG00000224089
hsa-miR-141-3p	ENSG00000226023
hsa-miR-141-3p	ENSG00000226600
hsa-miR-141-3p	ENSG00000226929
hsa-miR-141-3p	ENSG00000228517
hsa-miR-141-3p	ENSG00000230347
hsa-miR-141-3p	ENSG00000230594
hsa-miR-141-3p	ENSG00000236126
hsa-miR-141-3p	ENSG00000236371
hsa-miR-141-3p	ENSG00000236446
hsa-miR-141-3p	ENSG00000237957
hsa-miR-141-3p	ENSG00000242362
hsa-miR-141-3p	ENSG00000274386
hsa-miR-141-3p	ENSG00000278646
hsa-miR-195-5p	ENSG00000004777
hsa-miR-195-5p	ENSG00000005001
hsa-miR-195-5p	ENSG00000005206
hsa-miR-195-5p	ENSG00000007541
hsa-miR-195-5p	ENSG00000011376
hsa-miR-195-5p	ENSG00000023191
hsa-miR-195-5p	ENSG00000054523
hsa-miR-195-5p	ENSG00000061273
hsa-miR-195-5p	ENSG00000061492
hsa-miR-195-5p	ENSG00000065609
hsa-miR-195-5p	ENSG00000065802
hsa-miR-195-5p	ENSG00000067596
hsa-miR-195-5p	ENSG00000072952
hsa-miR-195-5p	ENSG00000078098
hsa-miR-195-5p	ENSG00000082258
hsa-miR-195-5p	ENSG00000083290
hsa-miR-195-5p	ENSG00000099203
hsa-miR-195-5p	ENSG00000100266
hsa-miR-195-5p	ENSG00000100441
hsa-miR-195-5p	ENSG00000101017
hsa-miR-195-5p	ENSG00000101307
hsa-miR-195-5p	ENSG00000102032
hsa-miR-195-5p	ENSG00000102984
hsa-miR-195-5p	ENSG00000105552
hsa-miR-195-5p	ENSG00000106624
hsa-miR-195-5p	ENSG00000107745
hsa-miR-195-5p	ENSG00000111275
hsa-miR-195-5p	ENSG00000111799
hsa-miR-195-5p	ENSG00000112715
hsa-miR-195-5p	ENSG00000113013
hsa-miR-195-5p	ENSG00000114786
hsa-miR-195-5p	ENSG00000115685
hsa-miR-195-5p	ENSG00000116685
hsa-miR-195-5p	ENSG00000119689
hsa-miR-195-5p	ENSG00000119707
hsa-miR-195-5p	ENSG00000119787
hsa-miR-195-5p	ENSG00000121101
hsa-miR-195-5p	ENSG00000121552
hsa-miR-195-5p	ENSG00000122783
hsa-miR-195-5p	ENSG00000124155
hsa-miR-195-5p	ENSG00000126214
hsa-miR-195-5p	ENSG00000127054
hsa-miR-195-5p	ENSG00000128989
hsa-miR-195-5p	ENSG00000130299
hsa-miR-195-5p	ENSG00000130313
hsa-miR-195-5p	ENSG00000135597
hsa-miR-195-5p	ENSG00000135972
hsa-miR-195-5p	ENSG00000137710
hsa-miR-195-5p	ENSG00000138061
hsa-miR-195-5p	ENSG00000138435
hsa-miR-195-5p	ENSG00000140264
hsa-miR-195-5p	ENSG00000141279
hsa-miR-195-5p	ENSG00000142273
hsa-miR-195-5p	ENSG00000143190
hsa-miR-195-5p	ENSG00000143416
hsa-miR-195-5p	ENSG00000144445
hsa-miR-195-5p	ENSG00000144659
hsa-miR-195-5p	ENSG00000145626
hsa-miR-195-5p	ENSG00000146021
hsa-miR-195-5p	ENSG00000146410
hsa-miR-195-5p	ENSG00000147416
hsa-miR-195-5p	ENSG00000148985
hsa-miR-195-5p	ENSG00000149311
hsa-miR-195-5p	ENSG00000153982
hsa-miR-195-5p	ENSG00000155189
hsa-miR-195-5p	ENSG00000157985
hsa-miR-195-5p	ENSG00000166548
hsa-miR-195-5p	ENSG00000167130
hsa-miR-195-5p	ENSG00000169223
hsa-miR-195-5p	ENSG00000169857
hsa-miR-195-5p	ENSG00000170606
hsa-miR-195-5p	ENSG00000171824
hsa-miR-195-5p	ENSG00000173267
hsa-miR-195-5p	ENSG00000173338
hsa-miR-195-5p	ENSG00000173818
hsa-miR-195-5p	ENSG00000176658
hsa-miR-195-5p	ENSG00000177189
hsa-miR-195-5p	ENSG00000177302
hsa-miR-195-5p	ENSG00000177963
hsa-miR-195-5p	ENSG00000179889
hsa-miR-195-5p	ENSG00000183751
hsa-miR-195-5p	ENSG00000183765
hsa-miR-195-5p	ENSG00000185069
hsa-miR-195-5p	ENSG00000185559
hsa-miR-195-5p	ENSG00000186153
hsa-miR-195-5p	ENSG00000187017
hsa-miR-195-5p	ENSG00000187741
hsa-miR-195-5p	ENSG00000197070
hsa-miR-195-5p	ENSG00000204583
hsa-miR-195-5p	ENSG00000213085
hsa-miR-195-5p	ENSG00000214078
hsa-miR-195-5p	ENSG00000215183
hsa-miR-195-5p	ENSG00000228486
hsa-miR-195-5p	ENSG00000235268
hsa-miR-195-5p	ENSG00000239605
hsa-miR-195-5p	ENSG00000248746
hsa-miR-195-5p	ENSG00000256500
hsa-miR-195-5p	ENSG00000273749
hsa-miR-195-5p	ENSG00000274180
hsa-miR-200a-3p	ENSG00000031823
hsa-miR-200a-3p	ENSG00000087263
hsa-miR-200a-3p	ENSG00000090621
hsa-miR-200a-3p	ENSG00000091656
hsa-miR-200a-3p	ENSG00000100448
hsa-miR-200a-3p	ENSG00000101104
hsa-miR-200a-3p	ENSG00000101294
hsa-miR-200a-3p	ENSG00000105397
hsa-miR-200a-3p	ENSG00000111783
hsa-miR-200a-3p	ENSG00000111837
hsa-miR-200a-3p	ENSG00000115525
hsa-miR-200a-3p	ENSG00000124357
hsa-miR-200a-3p	ENSG00000131828
hsa-miR-200a-3p	ENSG00000148814
hsa-miR-200a-3p	ENSG00000158941
hsa-miR-200a-3p	ENSG00000162711
hsa-miR-200a-3p	ENSG00000166111
hsa-miR-200a-3p	ENSG00000166912
hsa-miR-200a-3p	ENSG00000167553
hsa-miR-200a-3p	ENSG00000171163
hsa-miR-200a-3p	ENSG00000180957
hsa-miR-200a-3p	ENSG00000182473
hsa-miR-200a-3p	ENSG00000188690
hsa-miR-200a-3p	ENSG00000197150
hsa-miR-200a-3p	ENSG00000203727
hsa-miR-200a-3p	ENSG00000204852
hsa-miR-200a-3p	ENSG00000228517
hsa-miR-200a-3p	ENSG00000236371
hsa-miR-200a-3p	ENSG00000236446
hsa-miR-200a-3p	ENSG00000278646
hsa-miR-200a-5p	ENSG00000011454
hsa-miR-200a-5p	ENSG00000086717
hsa-miR-200a-5p	ENSG00000104833
hsa-miR-200a-5p	ENSG00000121542
hsa-miR-200a-5p	ENSG00000135914
hsa-miR-200a-5p	ENSG00000137747
hsa-miR-200a-5p	ENSG00000147853
hsa-miR-200a-5p	ENSG00000161904
hsa-miR-200a-5p	ENSG00000167522
hsa-miR-200a-5p	ENSG00000168496
hsa-miR-200a-5p	ENSG00000172995
hsa-miR-200a-5p	ENSG00000180919
hsa-miR-214-3p	ENSG00000000457
hsa-miR-214-3p	ENSG00000001617
hsa-miR-214-3p	ENSG00000002834
hsa-miR-214-3p	ENSG00000002919
hsa-miR-214-3p	ENSG00000004059
hsa-miR-214-3p	ENSG00000004809
hsa-miR-214-3p	ENSG00000005206
hsa-miR-214-3p	ENSG00000005486
hsa-miR-214-3p	ENSG00000006025
hsa-miR-214-3p	ENSG00000006071
hsa-miR-214-3p	ENSG00000006118
hsa-miR-214-3p	ENSG00000006125
hsa-miR-214-3p	ENSG00000006282
hsa-miR-214-3p	ENSG00000006695
hsa-miR-214-3p	ENSG00000007237
hsa-miR-214-3p	ENSG00000007255
hsa-miR-214-3p	ENSG00000007376
hsa-miR-214-3p	ENSG00000007541
hsa-miR-214-3p	ENSG00000008130
hsa-miR-214-3p	ENSG00000008283
hsa-miR-214-3p	ENSG00000008441
hsa-miR-214-3p	ENSG00000008710
hsa-miR-214-3p	ENSG00000008735
hsa-miR-214-3p	ENSG00000009724
hsa-miR-214-3p	ENSG00000010278
hsa-miR-214-3p	ENSG00000010322
hsa-miR-214-3p	ENSG00000010379
hsa-miR-214-3p	ENSG00000010610
hsa-miR-214-3p	ENSG00000011376
hsa-miR-214-3p	ENSG00000012779
hsa-miR-214-3p	ENSG00000013306
hsa-miR-214-3p	ENSG00000013810
hsa-miR-214-3p	ENSG00000015153
hsa-miR-214-3p	ENSG00000015475
hsa-miR-214-3p	ENSG00000018280
hsa-miR-214-3p	ENSG00000019505
hsa-miR-214-3p	ENSG00000023191
hsa-miR-214-3p	ENSG00000024422
hsa-miR-214-3p	ENSG00000026036
hsa-miR-214-3p	ENSG00000026950
hsa-miR-214-3p	ENSG00000030582
hsa-miR-214-3p	ENSG00000031823
hsa-miR-214-3p	ENSG00000032444
hsa-miR-214-3p	ENSG00000033011
hsa-miR-214-3p	ENSG00000033800
hsa-miR-214-3p	ENSG00000041880
hsa-miR-214-3p	ENSG00000042445
hsa-miR-214-3p	ENSG00000047648
hsa-miR-214-3p	ENSG00000048471
hsa-miR-214-3p	ENSG00000049249
hsa-miR-214-3p	ENSG00000049283
hsa-miR-214-3p	ENSG00000049541
hsa-miR-214-3p	ENSG00000049618
hsa-miR-214-3p	ENSG00000049759
hsa-miR-214-3p	ENSG00000049769
hsa-miR-214-3p	ENSG00000050030
hsa-miR-214-3p	ENSG00000053702
hsa-miR-214-3p	ENSG00000054148
hsa-miR-214-3p	ENSG00000054611
hsa-miR-214-3p	ENSG00000054654
hsa-miR-214-3p	ENSG00000054967
hsa-miR-214-3p	ENSG00000055483
hsa-miR-214-3p	ENSG00000055957
hsa-miR-214-3p	ENSG00000057935
hsa-miR-214-3p	ENSG00000059122
hsa-miR-214-3p	ENSG00000059145
hsa-miR-214-3p	ENSG00000060491
hsa-miR-214-3p	ENSG00000060566
hsa-miR-214-3p	ENSG00000061337
hsa-miR-214-3p	ENSG00000062038
hsa-miR-214-3p	ENSG00000062485
hsa-miR-214-3p	ENSG00000063854
hsa-miR-214-3p	ENSG00000063978
hsa-miR-214-3p	ENSG00000064300
hsa-miR-214-3p	ENSG00000064547
hsa-miR-214-3p	ENSG00000064687
hsa-miR-214-3p	ENSG00000065054
hsa-miR-214-3p	ENSG00000065802
hsa-miR-214-3p	ENSG00000066230
hsa-miR-214-3p	ENSG00000066933
hsa-miR-214-3p	ENSG00000067057
hsa-miR-214-3p	ENSG00000068745
hsa-miR-214-3p	ENSG00000069812
hsa-miR-214-3p	ENSG00000069966
hsa-miR-214-3p	ENSG00000070404
hsa-miR-214-3p	ENSG00000070413
hsa-miR-214-3p	ENSG00000070526
hsa-miR-214-3p	ENSG00000071655
hsa-miR-214-3p	ENSG00000072042
hsa-miR-214-3p	ENSG00000072121
hsa-miR-214-3p	ENSG00000072135
hsa-miR-214-3p	ENSG00000072163
hsa-miR-214-3p	ENSG00000072506
hsa-miR-214-3p	ENSG00000072518
hsa-miR-214-3p	ENSG00000073067
hsa-miR-214-3p	ENSG00000073536
hsa-miR-214-3p	ENSG00000073605
hsa-miR-214-3p	ENSG00000074054
hsa-miR-214-3p	ENSG00000074071
hsa-miR-214-3p	ENSG00000074370
hsa-miR-214-3p	ENSG00000076826
hsa-miR-214-3p	ENSG00000077238
hsa-miR-214-3p	ENSG00000077454
hsa-miR-214-3p	ENSG00000077782
hsa-miR-214-3p	ENSG00000078699
hsa-miR-214-3p	ENSG00000078814
hsa-miR-214-3p	ENSG00000078902
hsa-miR-214-3p	ENSG00000079277
hsa-miR-214-3p	ENSG00000080823
hsa-miR-214-3p	ENSG00000081692
hsa-miR-214-3p	ENSG00000082258
hsa-miR-214-3p	ENSG00000082805
hsa-miR-214-3p	ENSG00000083290
hsa-miR-214-3p	ENSG00000083828
hsa-miR-214-3p	ENSG00000084207
hsa-miR-214-3p	ENSG00000085511
hsa-miR-214-3p	ENSG00000085741
hsa-miR-214-3p	ENSG00000085999
hsa-miR-214-3p	ENSG00000086200
hsa-miR-214-3p	ENSG00000087085
hsa-miR-214-3p	ENSG00000087111
hsa-miR-214-3p	ENSG00000087116
hsa-miR-214-3p	ENSG00000087250
hsa-miR-214-3p	ENSG00000087266
hsa-miR-214-3p	ENSG00000088320
hsa-miR-214-3p	ENSG00000088356
hsa-miR-214-3p	ENSG00000088682
hsa-miR-214-3p	ENSG00000088836
hsa-miR-214-3p	ENSG00000089053
hsa-miR-214-3p	ENSG00000089157
hsa-miR-214-3p	ENSG00000089169
hsa-miR-214-3p	ENSG00000089177
hsa-miR-214-3p	ENSG00000089356
hsa-miR-214-3p	ENSG00000089486
hsa-miR-214-3p	ENSG00000089723
hsa-miR-214-3p	ENSG00000089847
hsa-miR-214-3p	ENSG00000090020
hsa-miR-214-3p	ENSG00000090061
hsa-miR-214-3p	ENSG00000090238
hsa-miR-214-3p	ENSG00000090565
hsa-miR-214-3p	ENSG00000090776
hsa-miR-214-3p	ENSG00000090863
hsa-miR-214-3p	ENSG00000091831
hsa-miR-214-3p	ENSG00000092068
hsa-miR-214-3p	ENSG00000092096
hsa-miR-214-3p	ENSG00000092098
hsa-miR-214-3p	ENSG00000092850
hsa-miR-214-3p	ENSG00000093010
hsa-miR-214-3p	ENSG00000095303
hsa-miR-214-3p	ENSG00000095777
hsa-miR-214-3p	ENSG00000096093
hsa-miR-214-3p	ENSG00000096996
hsa-miR-214-3p	ENSG00000099338
hsa-miR-214-3p	ENSG00000099622
hsa-miR-214-3p	ENSG00000099797
hsa-miR-214-3p	ENSG00000099889
hsa-miR-214-3p	ENSG00000099899
hsa-miR-214-3p	ENSG00000099917
hsa-miR-214-3p	ENSG00000099937
hsa-miR-214-3p	ENSG00000099957
hsa-miR-214-3p	ENSG00000099960
hsa-miR-214-3p	ENSG00000100023
hsa-miR-214-3p	ENSG00000100029
hsa-miR-214-3p	ENSG00000100083
hsa-miR-214-3p	ENSG00000100099
hsa-miR-214-3p	ENSG00000100139
hsa-miR-214-3p	ENSG00000100142
hsa-miR-214-3p	ENSG00000100147
hsa-miR-214-3p	ENSG00000100151
hsa-miR-214-3p	ENSG00000100162
hsa-miR-214-3p	ENSG00000100226
hsa-miR-214-3p	ENSG00000100234
hsa-miR-214-3p	ENSG00000100239
hsa-miR-214-3p	ENSG00000100242
hsa-miR-214-3p	ENSG00000100266
hsa-miR-214-3p	ENSG00000100290
hsa-miR-214-3p	ENSG00000100294
hsa-miR-214-3p	ENSG00000100297
hsa-miR-214-3p	ENSG00000100298
hsa-miR-214-3p	ENSG00000100330
hsa-miR-214-3p	ENSG00000100348
hsa-miR-214-3p	ENSG00000100353
hsa-miR-214-3p	ENSG00000100413
hsa-miR-214-3p	ENSG00000100416
hsa-miR-214-3p	ENSG00000100417
hsa-miR-214-3p	ENSG00000100422
hsa-miR-214-3p	ENSG00000100439
hsa-miR-214-3p	ENSG00000100577
hsa-miR-214-3p	ENSG00000100593
hsa-miR-214-3p	ENSG00000100605
hsa-miR-214-3p	ENSG00000100647
hsa-miR-214-3p	ENSG00000100726
hsa-miR-214-3p	ENSG00000100889
hsa-miR-214-3p	ENSG00000100994
hsa-miR-214-3p	ENSG00000101180
hsa-miR-214-3p	ENSG00000101197
hsa-miR-214-3p	ENSG00000101199
hsa-miR-214-3p	ENSG00000101204
hsa-miR-214-3p	ENSG00000101213
hsa-miR-214-3p	ENSG00000101224
hsa-miR-214-3p	ENSG00000101276
hsa-miR-214-3p	ENSG00000101400
hsa-miR-214-3p	ENSG00000101460
hsa-miR-214-3p	ENSG00000101463
hsa-miR-214-3p	ENSG00000101638
hsa-miR-214-3p	ENSG00000101940
hsa-miR-214-3p	ENSG00000102032
hsa-miR-214-3p	ENSG00000102225
hsa-miR-214-3p	ENSG00000102290
hsa-miR-214-3p	ENSG00000102312
hsa-miR-214-3p	ENSG00000102595
hsa-miR-214-3p	ENSG00000102753
hsa-miR-214-3p	ENSG00000102871
hsa-miR-214-3p	ENSG00000102882
hsa-miR-214-3p	ENSG00000102984
hsa-miR-214-3p	ENSG00000103005
hsa-miR-214-3p	ENSG00000103035
hsa-miR-214-3p	ENSG00000103066
hsa-miR-214-3p	ENSG00000103089
hsa-miR-214-3p	ENSG00000103126
hsa-miR-214-3p	ENSG00000103148
hsa-miR-214-3p	ENSG00000103174
hsa-miR-214-3p	ENSG00000103194
hsa-miR-214-3p	ENSG00000103196
hsa-miR-214-3p	ENSG00000103197
hsa-miR-214-3p	ENSG00000103222
hsa-miR-214-3p	ENSG00000103248
hsa-miR-214-3p	ENSG00000103254
hsa-miR-214-3p	ENSG00000103335
hsa-miR-214-3p	ENSG00000103375
hsa-miR-214-3p	ENSG00000103485
hsa-miR-214-3p	ENSG00000103510
hsa-miR-214-3p	ENSG00000103723
hsa-miR-214-3p	ENSG00000103876
hsa-miR-214-3p	ENSG00000104365
hsa-miR-214-3p	ENSG00000104415
hsa-miR-214-3p	ENSG00000104529
hsa-miR-214-3p	ENSG00000104774
hsa-miR-214-3p	ENSG00000104814
hsa-miR-214-3p	ENSG00000104835
hsa-miR-214-3p	ENSG00000104848
hsa-miR-214-3p	ENSG00000104870
hsa-miR-214-3p	ENSG00000104881
hsa-miR-214-3p	ENSG00000104884
hsa-miR-214-3p	ENSG00000104888
hsa-miR-214-3p	ENSG00000104894
hsa-miR-214-3p	ENSG00000104936
hsa-miR-214-3p	ENSG00000104946
hsa-miR-214-3p	ENSG00000104969
hsa-miR-214-3p	ENSG00000104976
hsa-miR-214-3p	ENSG00000105186
hsa-miR-214-3p	ENSG00000105248
hsa-miR-214-3p	ENSG00000105278
hsa-miR-214-3p	ENSG00000105369
hsa-miR-214-3p	ENSG00000105397
hsa-miR-214-3p	ENSG00000105443
hsa-miR-214-3p	ENSG00000105568
hsa-miR-214-3p	ENSG00000105583
hsa-miR-214-3p	ENSG00000105640
hsa-miR-214-3p	ENSG00000105642
hsa-miR-214-3p	ENSG00000105662
hsa-miR-214-3p	ENSG00000105676
hsa-miR-214-3p	ENSG00000105700
hsa-miR-214-3p	ENSG00000105705
hsa-miR-214-3p	ENSG00000105717
hsa-miR-214-3p	ENSG00000105993
hsa-miR-214-3p	ENSG00000106125
hsa-miR-214-3p	ENSG00000106211
hsa-miR-214-3p	ENSG00000106367
hsa-miR-214-3p	ENSG00000106771
hsa-miR-214-3p	ENSG00000106785
hsa-miR-214-3p	ENSG00000106991
hsa-miR-214-3p	ENSG00000107331
hsa-miR-214-3p	ENSG00000107404
hsa-miR-214-3p	ENSG00000107738
hsa-miR-214-3p	ENSG00000107938
hsa-miR-214-3p	ENSG00000108107
hsa-miR-214-3p	ENSG00000108370
hsa-miR-214-3p	ENSG00000108384
hsa-miR-214-3p	ENSG00000108387
hsa-miR-214-3p	ENSG00000108591
hsa-miR-214-3p	ENSG00000108602
hsa-miR-214-3p	ENSG00000108784
hsa-miR-214-3p	ENSG00000108797
hsa-miR-214-3p	ENSG00000108799
hsa-miR-214-3p	ENSG00000108846
hsa-miR-214-3p	ENSG00000108852
hsa-miR-214-3p	ENSG00000108946
hsa-miR-214-3p	ENSG00000109113
hsa-miR-214-3p	ENSG00000109320
hsa-miR-214-3p	ENSG00000109625
hsa-miR-214-3p	ENSG00000109832
hsa-miR-214-3p	ENSG00000110066
hsa-miR-214-3p	ENSG00000110108
hsa-miR-214-3p	ENSG00000110328
hsa-miR-214-3p	ENSG00000110514
hsa-miR-214-3p	ENSG00000110713
hsa-miR-214-3p	ENSG00000110786
hsa-miR-214-3p	ENSG00000110799
hsa-miR-214-3p	ENSG00000111186
hsa-miR-214-3p	ENSG00000111241
hsa-miR-214-3p	ENSG00000111331
hsa-miR-214-3p	ENSG00000111701
hsa-miR-214-3p	ENSG00000112425
hsa-miR-214-3p	ENSG00000112531
hsa-miR-214-3p	ENSG00000112679
hsa-miR-214-3p	ENSG00000112782
hsa-miR-214-3p	ENSG00000113119
hsa-miR-214-3p	ENSG00000113312
hsa-miR-214-3p	ENSG00000113763
hsa-miR-214-3p	ENSG00000113790
hsa-miR-214-3p	ENSG00000113845
hsa-miR-214-3p	ENSG00000114626
hsa-miR-214-3p	ENSG00000114648
hsa-miR-214-3p	ENSG00000114738
hsa-miR-214-3p	ENSG00000114786
hsa-miR-214-3p	ENSG00000114867
hsa-miR-214-3p	ENSG00000114982
hsa-miR-214-3p	ENSG00000114988
hsa-miR-214-3p	ENSG00000115138
hsa-miR-214-3p	ENSG00000115286
hsa-miR-214-3p	ENSG00000115297
hsa-miR-214-3p	ENSG00000115468
hsa-miR-214-3p	ENSG00000115486
hsa-miR-214-3p	ENSG00000115602
hsa-miR-214-3p	ENSG00000115677
hsa-miR-214-3p	ENSG00000115970
hsa-miR-214-3p	ENSG00000116221
hsa-miR-214-3p	ENSG00000116337
hsa-miR-214-3p	ENSG00000116396
hsa-miR-214-3p	ENSG00000116604
hsa-miR-214-3p	ENSG00000116649
hsa-miR-214-3p	ENSG00000117013
hsa-miR-214-3p	ENSG00000117016
hsa-miR-214-3p	ENSG00000117425
hsa-miR-214-3p	ENSG00000117480
hsa-miR-214-3p	ENSG00000117983
hsa-miR-214-3p	ENSG00000118058
hsa-miR-214-3p	ENSG00000118096
hsa-miR-214-3p	ENSG00000118432
hsa-miR-214-3p	ENSG00000118492
hsa-miR-214-3p	ENSG00000118579
hsa-miR-214-3p	ENSG00000118900
hsa-miR-214-3p	ENSG00000119227
hsa-miR-214-3p	ENSG00000119333
hsa-miR-214-3p	ENSG00000119508
hsa-miR-214-3p	ENSG00000119681
hsa-miR-214-3p	ENSG00000119688
hsa-miR-214-3p	ENSG00000119689
hsa-miR-214-3p	ENSG00000120833
hsa-miR-214-3p	ENSG00000120896
hsa-miR-214-3p	ENSG00000121671
hsa-miR-214-3p	ENSG00000121903
hsa-miR-214-3p	ENSG00000122133
hsa-miR-214-3p	ENSG00000122390
hsa-miR-214-3p	ENSG00000122515
hsa-miR-214-3p	ENSG00000122679
hsa-miR-214-3p	ENSG00000123154
hsa-miR-214-3p	ENSG00000123342
hsa-miR-214-3p	ENSG00000123415
hsa-miR-214-3p	ENSG00000123810
hsa-miR-214-3p	ENSG00000123815
hsa-miR-214-3p	ENSG00000124074
hsa-miR-214-3p	ENSG00000124102
hsa-miR-214-3p	ENSG00000124104
hsa-miR-214-3p	ENSG00000124155
hsa-miR-214-3p	ENSG00000124493
hsa-miR-214-3p	ENSG00000124508
hsa-miR-214-3p	ENSG00000124535
hsa-miR-214-3p	ENSG00000124596
hsa-miR-214-3p	ENSG00000124641
hsa-miR-214-3p	ENSG00000124678
hsa-miR-214-3p	ENSG00000124702
hsa-miR-214-3p	ENSG00000124782
hsa-miR-214-3p	ENSG00000124787
hsa-miR-214-3p	ENSG00000125089
hsa-miR-214-3p	ENSG00000125144
hsa-miR-214-3p	ENSG00000125148
hsa-miR-214-3p	ENSG00000125170
hsa-miR-214-3p	ENSG00000125449
hsa-miR-214-3p	ENSG00000125691
hsa-miR-214-3p	ENSG00000125746
hsa-miR-214-3p	ENSG00000125779
hsa-miR-214-3p	ENSG00000125967
hsa-miR-214-3p	ENSG00000126091
hsa-miR-214-3p	ENSG00000126233
hsa-miR-214-3p	ENSG00000126246
hsa-miR-214-3p	ENSG00000126247
hsa-miR-214-3p	ENSG00000126391
hsa-miR-214-3p	ENSG00000126562
hsa-miR-214-3p	ENSG00000126602
hsa-miR-214-3p	ENSG00000127084
hsa-miR-214-3p	ENSG00000127191
hsa-miR-214-3p	ENSG00000127419
hsa-miR-214-3p	ENSG00000127452
hsa-miR-214-3p	ENSG00000127511
hsa-miR-214-3p	ENSG00000127540
hsa-miR-214-3p	ENSG00000127554
hsa-miR-214-3p	ENSG00000127603
hsa-miR-214-3p	ENSG00000127663
hsa-miR-214-3p	ENSG00000127824
hsa-miR-214-3p	ENSG00000128040
hsa-miR-214-3p	ENSG00000128185
hsa-miR-214-3p	ENSG00000128271
hsa-miR-214-3p	ENSG00000128581
hsa-miR-214-3p	ENSG00000128908
hsa-miR-214-3p	ENSG00000128928
hsa-miR-214-3p	ENSG00000128965
hsa-miR-214-3p	ENSG00000129219
hsa-miR-214-3p	ENSG00000129255
hsa-miR-214-3p	ENSG00000129467
hsa-miR-214-3p	ENSG00000129538
hsa-miR-214-3p	ENSG00000129673
hsa-miR-214-3p	ENSG00000129749
hsa-miR-214-3p	ENSG00000129990
hsa-miR-214-3p	ENSG00000130038
hsa-miR-214-3p	ENSG00000130045
hsa-miR-214-3p	ENSG00000130193
hsa-miR-214-3p	ENSG00000130244
hsa-miR-214-3p	ENSG00000130255
hsa-miR-214-3p	ENSG00000130270
hsa-miR-214-3p	ENSG00000130313
hsa-miR-214-3p	ENSG00000130383
hsa-miR-214-3p	ENSG00000130508
hsa-miR-214-3p	ENSG00000130529
hsa-miR-214-3p	ENSG00000130545
hsa-miR-214-3p	ENSG00000130584
hsa-miR-214-3p	ENSG00000130653
hsa-miR-214-3p	ENSG00000130695
hsa-miR-214-3p	ENSG00000130720
hsa-miR-214-3p	ENSG00000130725
hsa-miR-214-3p	ENSG00000130731
hsa-miR-214-3p	ENSG00000130768
hsa-miR-214-3p	ENSG00000130813
hsa-miR-214-3p	ENSG00000130818
hsa-miR-214-3p	ENSG00000130876
hsa-miR-214-3p	ENSG00000130881
hsa-miR-214-3p	ENSG00000131061
hsa-miR-214-3p	ENSG00000131115
hsa-miR-214-3p	ENSG00000131148
hsa-miR-214-3p	ENSG00000131408
hsa-miR-214-3p	ENSG00000131504
hsa-miR-214-3p	ENSG00000131697
hsa-miR-214-3p	ENSG00000131944
hsa-miR-214-3p	ENSG00000132153
hsa-miR-214-3p	ENSG00000132196
hsa-miR-214-3p	ENSG00000132207
hsa-miR-214-3p	ENSG00000132361
hsa-miR-214-3p	ENSG00000132481
hsa-miR-214-3p	ENSG00000132563
hsa-miR-214-3p	ENSG00000132677
hsa-miR-214-3p	ENSG00000133027
hsa-miR-214-3p	ENSG00000133048
hsa-miR-214-3p	ENSG00000133067
hsa-miR-214-3p	ENSG00000133195
hsa-miR-214-3p	ENSG00000133247
hsa-miR-214-3p	ENSG00000133256
hsa-miR-214-3p	ENSG00000134046
hsa-miR-214-3p	ENSG00000134121
hsa-miR-214-3p	ENSG00000134184
hsa-miR-214-3p	ENSG00000134516
hsa-miR-214-3p	ENSG00000134686
hsa-miR-214-3p	ENSG00000134817
hsa-miR-214-3p	ENSG00000134825
hsa-miR-214-3p	ENSG00000135063
hsa-miR-214-3p	ENSG00000135100
hsa-miR-214-3p	ENSG00000135272
hsa-miR-214-3p	ENSG00000135404
hsa-miR-214-3p	ENSG00000135436
hsa-miR-214-3p	ENSG00000135437
hsa-miR-214-3p	ENSG00000135472
hsa-miR-214-3p	ENSG00000135476
hsa-miR-214-3p	ENSG00000135709
hsa-miR-214-3p	ENSG00000135720
hsa-miR-214-3p	ENSG00000135835
hsa-miR-214-3p	ENSG00000135902
hsa-miR-214-3p	ENSG00000135912
hsa-miR-214-3p	ENSG00000135966
hsa-miR-214-3p	ENSG00000136002
hsa-miR-214-3p	ENSG00000136243
hsa-miR-214-3p	ENSG00000136271
hsa-miR-214-3p	ENSG00000136450
hsa-miR-214-3p	ENSG00000136478
hsa-miR-214-3p	ENSG00000136718
hsa-miR-214-3p	ENSG00000136807
hsa-miR-214-3p	ENSG00000136856
hsa-miR-214-3p	ENSG00000136883
hsa-miR-214-3p	ENSG00000136931
hsa-miR-214-3p	ENSG00000136935
hsa-miR-214-3p	ENSG00000137135
hsa-miR-214-3p	ENSG00000137198
hsa-miR-214-3p	ENSG00000137225
hsa-miR-214-3p	ENSG00000137500
hsa-miR-214-3p	ENSG00000137672
hsa-miR-214-3p	ENSG00000137699
hsa-miR-214-3p	ENSG00000138107
hsa-miR-214-3p	ENSG00000138495
hsa-miR-214-3p	ENSG00000138617
hsa-miR-214-3p	ENSG00000138639
hsa-miR-214-3p	ENSG00000138670
hsa-miR-214-3p	ENSG00000138867
hsa-miR-214-3p	ENSG00000139178
hsa-miR-214-3p	ENSG00000139200
hsa-miR-214-3p	ENSG00000139436
hsa-miR-214-3p	ENSG00000139437
hsa-miR-214-3p	ENSG00000139438
hsa-miR-214-3p	ENSG00000139546
hsa-miR-214-3p	ENSG00000139567
hsa-miR-214-3p	ENSG00000139636
hsa-miR-214-3p	ENSG00000139842
hsa-miR-214-3p	ENSG00000139998
hsa-miR-214-3p	ENSG00000140157
hsa-miR-214-3p	ENSG00000140264
hsa-miR-214-3p	ENSG00000140297
hsa-miR-214-3p	ENSG00000140332
hsa-miR-214-3p	ENSG00000140368
hsa-miR-214-3p	ENSG00000140455
hsa-miR-214-3p	ENSG00000140623
hsa-miR-214-3p	ENSG00000140650
hsa-miR-214-3p	ENSG00000140688
hsa-miR-214-3p	ENSG00000140691
hsa-miR-214-3p	ENSG00000140718
hsa-miR-214-3p	ENSG00000140854
hsa-miR-214-3p	ENSG00000140859
hsa-miR-214-3p	ENSG00000140955
hsa-miR-214-3p	ENSG00000140990
hsa-miR-214-3p	ENSG00000140995
hsa-miR-214-3p	ENSG00000141013
hsa-miR-214-3p	ENSG00000141404
hsa-miR-214-3p	ENSG00000141506
hsa-miR-214-3p	ENSG00000141524
hsa-miR-214-3p	ENSG00000141540
hsa-miR-214-3p	ENSG00000141543
hsa-miR-214-3p	ENSG00000141551
hsa-miR-214-3p	ENSG00000141552
hsa-miR-214-3p	ENSG00000141556
hsa-miR-214-3p	ENSG00000141560
hsa-miR-214-3p	ENSG00000141562
hsa-miR-214-3p	ENSG00000141665
hsa-miR-214-3p	ENSG00000141736
hsa-miR-214-3p	ENSG00000141738
hsa-miR-214-3p	ENSG00000141744
hsa-miR-214-3p	ENSG00000141753
hsa-miR-214-3p	ENSG00000141985
hsa-miR-214-3p	ENSG00000141994
hsa-miR-214-3p	ENSG00000142082
hsa-miR-214-3p	ENSG00000142347
hsa-miR-214-3p	ENSG00000142444
hsa-miR-214-3p	ENSG00000142627
hsa-miR-214-3p	ENSG00000142669
hsa-miR-214-3p	ENSG00000142687
hsa-miR-214-3p	ENSG00000143257
hsa-miR-214-3p	ENSG00000143321
hsa-miR-214-3p	ENSG00000143365
hsa-miR-214-3p	ENSG00000143569
hsa-miR-214-3p	ENSG00000143727
hsa-miR-214-3p	ENSG00000143740
hsa-miR-214-3p	ENSG00000143786
hsa-miR-214-3p	ENSG00000143839
hsa-miR-214-3p	ENSG00000143850
hsa-miR-214-3p	ENSG00000144485
hsa-miR-214-3p	ENSG00000144567
hsa-miR-214-3p	ENSG00000144591
hsa-miR-214-3p	ENSG00000145014
hsa-miR-214-3p	ENSG00000145020
hsa-miR-214-3p	ENSG00000145191
hsa-miR-214-3p	ENSG00000145194
hsa-miR-214-3p	ENSG00000145198
hsa-miR-214-3p	ENSG00000145882
hsa-miR-214-3p	ENSG00000145916
hsa-miR-214-3p	ENSG00000145920
hsa-miR-214-3p	ENSG00000146067
hsa-miR-214-3p	ENSG00000146090
hsa-miR-214-3p	ENSG00000146122
hsa-miR-214-3p	ENSG00000146221
hsa-miR-214-3p	ENSG00000146232
hsa-miR-214-3p	ENSG00000146360
hsa-miR-214-3p	ENSG00000146576
hsa-miR-214-3p	ENSG00000147164
hsa-miR-214-3p	ENSG00000147364
hsa-miR-214-3p	ENSG00000147443
hsa-miR-214-3p	ENSG00000147689
hsa-miR-214-3p	ENSG00000147789
hsa-miR-214-3p	ENSG00000148204
hsa-miR-214-3p	ENSG00000148229
hsa-miR-214-3p	ENSG00000148288
hsa-miR-214-3p	ENSG00000148339
hsa-miR-214-3p	ENSG00000148719
hsa-miR-214-3p	ENSG00000148735
hsa-miR-214-3p	ENSG00000149091
hsa-miR-214-3p	ENSG00000149131
hsa-miR-214-3p	ENSG00000149179
hsa-miR-214-3p	ENSG00000149201
hsa-miR-214-3p	ENSG00000149262
hsa-miR-214-3p	ENSG00000149328
hsa-miR-214-3p	ENSG00000149357
hsa-miR-214-3p	ENSG00000149488
hsa-miR-214-3p	ENSG00000149499
hsa-miR-214-3p	ENSG00000149503
hsa-miR-214-3p	ENSG00000149599
hsa-miR-214-3p	ENSG00000149781
hsa-miR-214-3p	ENSG00000149809
hsa-miR-214-3p	ENSG00000149926
hsa-miR-214-3p	ENSG00000150281
hsa-miR-214-3p	ENSG00000150967
hsa-miR-214-3p	ENSG00000151062
hsa-miR-214-3p	ENSG00000151366
hsa-miR-214-3p	ENSG00000151552
hsa-miR-214-3p	ENSG00000151651
hsa-miR-214-3p	ENSG00000151726
hsa-miR-214-3p	ENSG00000152254
hsa-miR-214-3p	ENSG00000152767
hsa-miR-214-3p	ENSG00000153093
hsa-miR-214-3p	ENSG00000153294
hsa-miR-214-3p	ENSG00000153303
hsa-miR-214-3p	ENSG00000153391
hsa-miR-214-3p	ENSG00000153406
hsa-miR-214-3p	ENSG00000153443
hsa-miR-214-3p	ENSG00000153786
hsa-miR-214-3p	ENSG00000153885
hsa-miR-214-3p	ENSG00000153944
hsa-miR-214-3p	ENSG00000154025
hsa-miR-214-3p	ENSG00000154529
hsa-miR-214-3p	ENSG00000154620
hsa-miR-214-3p	ENSG00000154743
hsa-miR-214-3p	ENSG00000155066
hsa-miR-214-3p	ENSG00000155158
hsa-miR-214-3p	ENSG00000155363
hsa-miR-214-3p	ENSG00000155367
hsa-miR-214-3p	ENSG00000155666
hsa-miR-214-3p	ENSG00000156218
hsa-miR-214-3p	ENSG00000156269
hsa-miR-214-3p	ENSG00000156298
hsa-miR-214-3p	ENSG00000156411
hsa-miR-214-3p	ENSG00000156471
hsa-miR-214-3p	ENSG00000156603
hsa-miR-214-3p	ENSG00000156711
hsa-miR-214-3p	ENSG00000156853
hsa-miR-214-3p	ENSG00000157216
hsa-miR-214-3p	ENSG00000157570
hsa-miR-214-3p	ENSG00000157637
hsa-miR-214-3p	ENSG00000157873
hsa-miR-214-3p	ENSG00000157911
hsa-miR-214-3p	ENSG00000158106
hsa-miR-214-3p	ENSG00000158163
hsa-miR-214-3p	ENSG00000158258
hsa-miR-214-3p	ENSG00000158710
hsa-miR-214-3p	ENSG00000158717
hsa-miR-214-3p	ENSG00000158747
hsa-miR-214-3p	ENSG00000158863
hsa-miR-214-3p	ENSG00000158887
hsa-miR-214-3p	ENSG00000158941
hsa-miR-214-3p	ENSG00000159111
hsa-miR-214-3p	ENSG00000159496
hsa-miR-214-3p	ENSG00000159527
hsa-miR-214-3p	ENSG00000159640
hsa-miR-214-3p	ENSG00000159685
hsa-miR-214-3p	ENSG00000159713
hsa-miR-214-3p	ENSG00000159733
hsa-miR-214-3p	ENSG00000159788
hsa-miR-214-3p	ENSG00000160014
hsa-miR-214-3p	ENSG00000160075
hsa-miR-214-3p	ENSG00000160087
hsa-miR-214-3p	ENSG00000160214
hsa-miR-214-3p	ENSG00000160293
hsa-miR-214-3p	ENSG00000160325
hsa-miR-214-3p	ENSG00000160360
hsa-miR-214-3p	ENSG00000160741
hsa-miR-214-3p	ENSG00000160753
hsa-miR-214-3p	ENSG00000160767
hsa-miR-214-3p	ENSG00000160783
hsa-miR-214-3p	ENSG00000160801
hsa-miR-214-3p	ENSG00000160867
hsa-miR-214-3p	ENSG00000160917
hsa-miR-214-3p	ENSG00000160932
hsa-miR-214-3p	ENSG00000160953
hsa-miR-214-3p	ENSG00000161010
hsa-miR-214-3p	ENSG00000161091
hsa-miR-214-3p	ENSG00000161395
hsa-miR-214-3p	ENSG00000161618
hsa-miR-214-3p	ENSG00000161681
hsa-miR-214-3p	ENSG00000161682
hsa-miR-214-3p	ENSG00000161847
hsa-miR-214-3p	ENSG00000161940
hsa-miR-214-3p	ENSG00000161960
hsa-miR-214-3p	ENSG00000161973
hsa-miR-214-3p	ENSG00000162062
hsa-miR-214-3p	ENSG00000162063
hsa-miR-214-3p	ENSG00000162066
hsa-miR-214-3p	ENSG00000162144
hsa-miR-214-3p	ENSG00000162241
hsa-miR-214-3p	ENSG00000162365
hsa-miR-214-3p	ENSG00000162402
hsa-miR-214-3p	ENSG00000162456
hsa-miR-214-3p	ENSG00000162576
hsa-miR-214-3p	ENSG00000162949
hsa-miR-214-3p	ENSG00000162975
hsa-miR-214-3p	ENSG00000163126
hsa-miR-214-3p	ENSG00000163295
hsa-miR-214-3p	ENSG00000163344
hsa-miR-214-3p	ENSG00000163389
hsa-miR-214-3p	ENSG00000163395
hsa-miR-214-3p	ENSG00000163431
hsa-miR-214-3p	ENSG00000163517
hsa-miR-214-3p	ENSG00000163703
hsa-miR-214-3p	ENSG00000163710
hsa-miR-214-3p	ENSG00000163719
hsa-miR-214-3p	ENSG00000163864
hsa-miR-214-3p	ENSG00000163904
hsa-miR-214-3p	ENSG00000163947
hsa-miR-214-3p	ENSG00000163958
hsa-miR-214-3p	ENSG00000164037
hsa-miR-214-3p	ENSG00000164050
hsa-miR-214-3p	ENSG00000164053
hsa-miR-214-3p	ENSG00000164054
hsa-miR-214-3p	ENSG00000164068
hsa-miR-214-3p	ENSG00000164078
hsa-miR-214-3p	ENSG00000164082
hsa-miR-214-3p	ENSG00000164111
hsa-miR-214-3p	ENSG00000164318
hsa-miR-214-3p	ENSG00000164362
hsa-miR-214-3p	ENSG00000164488
hsa-miR-214-3p	ENSG00000164638
hsa-miR-214-3p	ENSG00000164855
hsa-miR-214-3p	ENSG00000165209
hsa-miR-214-3p	ENSG00000165475
hsa-miR-214-3p	ENSG00000165526
hsa-miR-214-3p	ENSG00000165695
hsa-miR-214-3p	ENSG00000165702
hsa-miR-214-3p	ENSG00000165731
hsa-miR-214-3p	ENSG00000165915
hsa-miR-214-3p	ENSG00000166147
hsa-miR-214-3p	ENSG00000166165
hsa-miR-214-3p	ENSG00000166173
hsa-miR-214-3p	ENSG00000166206
hsa-miR-214-3p	ENSG00000166246
hsa-miR-214-3p	ENSG00000166398
hsa-miR-214-3p	ENSG00000166452
hsa-miR-214-3p	ENSG00000166508
hsa-miR-214-3p	ENSG00000166546
hsa-miR-214-3p	ENSG00000166548
hsa-miR-214-3p	ENSG00000166682
hsa-miR-214-3p	ENSG00000166704
hsa-miR-214-3p	ENSG00000166813
hsa-miR-214-3p	ENSG00000166979
hsa-miR-214-3p	ENSG00000167083
hsa-miR-214-3p	ENSG00000167100
hsa-miR-214-3p	ENSG00000167106
hsa-miR-214-3p	ENSG00000167130
hsa-miR-214-3p	ENSG00000167173
hsa-miR-214-3p	ENSG00000167291
hsa-miR-214-3p	ENSG00000167302
hsa-miR-214-3p	ENSG00000167468
hsa-miR-214-3p	ENSG00000167487
hsa-miR-214-3p	ENSG00000167526
hsa-miR-214-3p	ENSG00000167553
hsa-miR-214-3p	ENSG00000167578
hsa-miR-214-3p	ENSG00000167595
hsa-miR-214-3p	ENSG00000167613
hsa-miR-214-3p	ENSG00000167632
hsa-miR-214-3p	ENSG00000167633
hsa-miR-214-3p	ENSG00000167699
hsa-miR-214-3p	ENSG00000167702
hsa-miR-214-3p	ENSG00000167716
hsa-miR-214-3p	ENSG00000167733
hsa-miR-214-3p	ENSG00000167751
hsa-miR-214-3p	ENSG00000167766
hsa-miR-214-3p	ENSG00000167770
hsa-miR-214-3p	ENSG00000167792
hsa-miR-214-3p	ENSG00000167799
hsa-miR-214-3p	ENSG00000167962
hsa-miR-214-3p	ENSG00000167965
hsa-miR-214-3p	ENSG00000168000
hsa-miR-214-3p	ENSG00000168061
hsa-miR-214-3p	ENSG00000168237
hsa-miR-214-3p	ENSG00000168314
hsa-miR-214-3p	ENSG00000168397
hsa-miR-214-3p	ENSG00000168476
hsa-miR-214-3p	ENSG00000168487
hsa-miR-214-3p	ENSG00000168490
hsa-miR-214-3p	ENSG00000168495
hsa-miR-214-3p	ENSG00000168763
hsa-miR-214-3p	ENSG00000168765
hsa-miR-214-3p	ENSG00000168899
hsa-miR-214-3p	ENSG00000168904
hsa-miR-214-3p	ENSG00000168918
hsa-miR-214-3p	ENSG00000168936
hsa-miR-214-3p	ENSG00000169071
hsa-miR-214-3p	ENSG00000169189
hsa-miR-214-3p	ENSG00000169217
hsa-miR-214-3p	ENSG00000169223
hsa-miR-214-3p	ENSG00000169228
hsa-miR-214-3p	ENSG00000169241
hsa-miR-214-3p	ENSG00000169302
hsa-miR-214-3p	ENSG00000169344
hsa-miR-214-3p	ENSG00000169372
hsa-miR-214-3p	ENSG00000169562
hsa-miR-214-3p	ENSG00000169592
hsa-miR-214-3p	ENSG00000169692
hsa-miR-214-3p	ENSG00000169710
hsa-miR-214-3p	ENSG00000169715
hsa-miR-214-3p	ENSG00000169752
hsa-miR-214-3p	ENSG00000169894
hsa-miR-214-3p	ENSG00000169896
hsa-miR-214-3p	ENSG00000170074
hsa-miR-214-3p	ENSG00000170166
hsa-miR-214-3p	ENSG00000170296
hsa-miR-214-3p	ENSG00000170423
hsa-miR-214-3p	ENSG00000170454
hsa-miR-214-3p	ENSG00000170579
hsa-miR-214-3p	ENSG00000170581
hsa-miR-214-3p	ENSG00000170633
hsa-miR-214-3p	ENSG00000170909
hsa-miR-214-3p	ENSG00000171045
hsa-miR-214-3p	ENSG00000171060
hsa-miR-214-3p	ENSG00000171094
hsa-miR-214-3p	ENSG00000171124
hsa-miR-214-3p	ENSG00000171163
hsa-miR-214-3p	ENSG00000171298
hsa-miR-214-3p	ENSG00000171443
hsa-miR-214-3p	ENSG00000171476
hsa-miR-214-3p	ENSG00000171551
hsa-miR-214-3p	ENSG00000171552
hsa-miR-214-3p	ENSG00000171813
hsa-miR-214-3p	ENSG00000171853
hsa-miR-214-3p	ENSG00000171960
hsa-miR-214-3p	ENSG00000172046
hsa-miR-214-3p	ENSG00000172053
hsa-miR-214-3p	ENSG00000172379
hsa-miR-214-3p	ENSG00000172382
hsa-miR-214-3p	ENSG00000172548
hsa-miR-214-3p	ENSG00000172780
hsa-miR-214-3p	ENSG00000172789
hsa-miR-214-3p	ENSG00000172824
hsa-miR-214-3p	ENSG00000172890
hsa-miR-214-3p	ENSG00000172893
hsa-miR-214-3p	ENSG00000172955
hsa-miR-214-3p	ENSG00000172987
hsa-miR-214-3p	ENSG00000173020
hsa-miR-214-3p	ENSG00000173137
hsa-miR-214-3p	ENSG00000173153
hsa-miR-214-3p	ENSG00000173156
hsa-miR-214-3p	ENSG00000173264
hsa-miR-214-3p	ENSG00000173327
hsa-miR-214-3p	ENSG00000173432
hsa-miR-214-3p	ENSG00000173641
hsa-miR-214-3p	ENSG00000173762
hsa-miR-214-3p	ENSG00000173898
hsa-miR-214-3p	ENSG00000174483
hsa-miR-214-3p	ENSG00000174672
hsa-miR-214-3p	ENSG00000174903
hsa-miR-214-3p	ENSG00000174950
hsa-miR-214-3p	ENSG00000174996
hsa-miR-214-3p	ENSG00000175048
hsa-miR-214-3p	ENSG00000175121
hsa-miR-214-3p	ENSG00000175166
hsa-miR-214-3p	ENSG00000175182
hsa-miR-214-3p	ENSG00000175215
hsa-miR-214-3p	ENSG00000175221
hsa-miR-214-3p	ENSG00000175224
hsa-miR-214-3p	ENSG00000175318
hsa-miR-214-3p	ENSG00000175325
hsa-miR-214-3p	ENSG00000175482
hsa-miR-214-3p	ENSG00000175518
hsa-miR-214-3p	ENSG00000175792
hsa-miR-214-3p	ENSG00000175866
hsa-miR-214-3p	ENSG00000175938
hsa-miR-214-3p	ENSG00000176058
hsa-miR-214-3p	ENSG00000176155
hsa-miR-214-3p	ENSG00000176383
hsa-miR-214-3p	ENSG00000176387
hsa-miR-214-3p	ENSG00000176533
hsa-miR-214-3p	ENSG00000176884
hsa-miR-214-3p	ENSG00000176986
hsa-miR-214-3p	ENSG00000177000
hsa-miR-214-3p	ENSG00000177045
hsa-miR-214-3p	ENSG00000177106
hsa-miR-214-3p	ENSG00000177189
hsa-miR-214-3p	ENSG00000177225
hsa-miR-214-3p	ENSG00000177302
hsa-miR-214-3p	ENSG00000177519
hsa-miR-214-3p	ENSG00000177685
hsa-miR-214-3p	ENSG00000177697
hsa-miR-214-3p	ENSG00000178026
hsa-miR-214-3p	ENSG00000178057
hsa-miR-214-3p	ENSG00000178209
hsa-miR-214-3p	ENSG00000178252
hsa-miR-214-3p	ENSG00000178467
hsa-miR-214-3p	ENSG00000178605
hsa-miR-214-3p	ENSG00000178773
hsa-miR-214-3p	ENSG00000178802
hsa-miR-214-3p	ENSG00000178922
hsa-miR-214-3p	ENSG00000178928
hsa-miR-214-3p	ENSG00000179044
hsa-miR-214-3p	ENSG00000179151
hsa-miR-214-3p	ENSG00000179271
hsa-miR-214-3p	ENSG00000179295
hsa-miR-214-3p	ENSG00000179532
hsa-miR-214-3p	ENSG00000179632
hsa-miR-214-3p	ENSG00000179776
hsa-miR-214-3p	ENSG00000179862
hsa-miR-214-3p	ENSG00000180089
hsa-miR-214-3p	ENSG00000180176
hsa-miR-214-3p	ENSG00000180264
hsa-miR-214-3p	ENSG00000180483
hsa-miR-214-3p	ENSG00000180834
hsa-miR-214-3p	ENSG00000181222
hsa-miR-214-3p	ENSG00000181291
hsa-miR-214-3p	ENSG00000181378
hsa-miR-214-3p	ENSG00000181392
hsa-miR-214-3p	ENSG00000181625
hsa-miR-214-3p	ENSG00000181638
hsa-miR-214-3p	ENSG00000181722
hsa-miR-214-3p	ENSG00000181790
hsa-miR-214-3p	ENSG00000181929
hsa-miR-214-3p	ENSG00000182162
hsa-miR-214-3p	ENSG00000182173
hsa-miR-214-3p	ENSG00000182175
hsa-miR-214-3p	ENSG00000182230
hsa-miR-214-3p	ENSG00000182247
hsa-miR-214-3p	ENSG00000182472
hsa-miR-214-3p	ENSG00000182473
hsa-miR-214-3p	ENSG00000182511
hsa-miR-214-3p	ENSG00000182541
hsa-miR-214-3p	ENSG00000182732
hsa-miR-214-3p	ENSG00000182957
hsa-miR-214-3p	ENSG00000183020
hsa-miR-214-3p	ENSG00000183023
hsa-miR-214-3p	ENSG00000183077
hsa-miR-214-3p	ENSG00000183248
hsa-miR-214-3p	ENSG00000183379
hsa-miR-214-3p	ENSG00000183484
hsa-miR-214-3p	ENSG00000183624
hsa-miR-214-3p	ENSG00000183628
hsa-miR-214-3p	ENSG00000183696
hsa-miR-214-3p	ENSG00000183751
hsa-miR-214-3p	ENSG00000183778
hsa-miR-214-3p	ENSG00000184154
hsa-miR-214-3p	ENSG00000184281
hsa-miR-214-3p	ENSG00000184371
hsa-miR-214-3p	ENSG00000184381
hsa-miR-214-3p	ENSG00000184500
hsa-miR-214-3p	ENSG00000184640
hsa-miR-214-3p	ENSG00000184697
hsa-miR-214-3p	ENSG00000184787
hsa-miR-214-3p	ENSG00000184916
hsa-miR-214-3p	ENSG00000184923
hsa-miR-214-3p	ENSG00000184986
hsa-miR-214-3p	ENSG00000185022
hsa-miR-214-3p	ENSG00000185049
hsa-miR-214-3p	ENSG00000185122
hsa-miR-214-3p	ENSG00000185133
hsa-miR-214-3p	ENSG00000185156
hsa-miR-214-3p	ENSG00000185176
hsa-miR-214-3p	ENSG00000185189
hsa-miR-214-3p	ENSG00000185269
hsa-miR-214-3p	ENSG00000185372
hsa-miR-214-3p	ENSG00000185379
hsa-miR-214-3p	ENSG00000185507
hsa-miR-214-3p	ENSG00000185513
hsa-miR-214-3p	ENSG00000185527
hsa-miR-214-3p	ENSG00000185686
hsa-miR-214-3p	ENSG00000185722
hsa-miR-214-3p	ENSG00000185825
hsa-miR-214-3p	ENSG00000185838
hsa-miR-214-3p	ENSG00000186174
hsa-miR-214-3p	ENSG00000186197
hsa-miR-214-3p	ENSG00000186470
hsa-miR-214-3p	ENSG00000186472
hsa-miR-214-3p	ENSG00000186501
hsa-miR-214-3p	ENSG00000186567
hsa-miR-214-3p	ENSG00000186577
hsa-miR-214-3p	ENSG00000186710
hsa-miR-214-3p	ENSG00000186792
hsa-miR-214-3p	ENSG00000186866
hsa-miR-214-3p	ENSG00000186868
hsa-miR-214-3p	ENSG00000186976
hsa-miR-214-3p	ENSG00000187045
hsa-miR-214-3p	ENSG00000187048
hsa-miR-214-3p	ENSG00000187193
hsa-miR-214-3p	ENSG00000187266
hsa-miR-214-3p	ENSG00000187630
hsa-miR-214-3p	ENSG00000187690
hsa-miR-214-3p	ENSG00000187726
hsa-miR-214-3p	ENSG00000187764
hsa-miR-214-3p	ENSG00000188191
hsa-miR-214-3p	ENSG00000188199
hsa-miR-214-3p	ENSG00000188313
hsa-miR-214-3p	ENSG00000188493
hsa-miR-214-3p	ENSG00000188517
hsa-miR-214-3p	ENSG00000188596
hsa-miR-214-3p	ENSG00000188603
hsa-miR-214-3p	ENSG00000188807
hsa-miR-214-3p	ENSG00000188859
hsa-miR-214-3p	ENSG00000188878
hsa-miR-214-3p	ENSG00000189013
hsa-miR-214-3p	ENSG00000189058
hsa-miR-214-3p	ENSG00000189159
hsa-miR-214-3p	ENSG00000189319
hsa-miR-214-3p	ENSG00000189362
hsa-miR-214-3p	ENSG00000196329
hsa-miR-214-3p	ENSG00000196417
hsa-miR-214-3p	ENSG00000196535
hsa-miR-214-3p	ENSG00000196557
hsa-miR-214-3p	ENSG00000196876
hsa-miR-214-3p	ENSG00000196923
hsa-miR-214-3p	ENSG00000196972
hsa-miR-214-3p	ENSG00000197114
hsa-miR-214-3p	ENSG00000197119
hsa-miR-214-3p	ENSG00000197150
hsa-miR-214-3p	ENSG00000197226
hsa-miR-214-3p	ENSG00000197353
hsa-miR-214-3p	ENSG00000197361
hsa-miR-214-3p	ENSG00000197451
hsa-miR-214-3p	ENSG00000197465
hsa-miR-214-3p	ENSG00000197548
hsa-miR-214-3p	ENSG00000197653
hsa-miR-214-3p	ENSG00000197746
hsa-miR-214-3p	ENSG00000197757
hsa-miR-214-3p	ENSG00000197763
hsa-miR-214-3p	ENSG00000198130
hsa-miR-214-3p	ENSG00000198169
hsa-miR-214-3p	ENSG00000198208
hsa-miR-214-3p	ENSG00000198286
hsa-miR-214-3p	ENSG00000198417
hsa-miR-214-3p	ENSG00000198722
hsa-miR-214-3p	ENSG00000198732
hsa-miR-214-3p	ENSG00000198736
hsa-miR-214-3p	ENSG00000198768
hsa-miR-214-3p	ENSG00000198792
hsa-miR-214-3p	ENSG00000198814
hsa-miR-214-3p	ENSG00000198911
hsa-miR-214-3p	ENSG00000198917
hsa-miR-214-3p	ENSG00000198929
hsa-miR-214-3p	ENSG00000198937
hsa-miR-214-3p	ENSG00000198951
hsa-miR-214-3p	ENSG00000203879
hsa-miR-214-3p	ENSG00000204160
hsa-miR-214-3p	ENSG00000204228
hsa-miR-214-3p	ENSG00000204300
hsa-miR-214-3p	ENSG00000204410
hsa-miR-214-3p	ENSG00000204677
hsa-miR-214-3p	ENSG00000204852
hsa-miR-214-3p	ENSG00000205277
hsa-miR-214-3p	ENSG00000205358
hsa-miR-214-3p	ENSG00000205476
hsa-miR-214-3p	ENSG00000211899
hsa-miR-214-3p	ENSG00000212123
hsa-miR-214-3p	ENSG00000212725
hsa-miR-214-3p	ENSG00000213023
hsa-miR-214-3p	ENSG00000213171
hsa-miR-214-3p	ENSG00000213199
hsa-miR-214-3p	ENSG00000213231
hsa-miR-214-3p	ENSG00000213366
hsa-miR-214-3p	ENSG00000213398
hsa-miR-214-3p	ENSG00000213413
hsa-miR-214-3p	ENSG00000213465
hsa-miR-214-3p	ENSG00000213892
hsa-miR-214-3p	ENSG00000213928
hsa-miR-214-3p	ENSG00000213930
hsa-miR-214-3p	ENSG00000214160
hsa-miR-214-3p	ENSG00000214212
hsa-miR-214-3p	ENSG00000214402
hsa-miR-214-3p	ENSG00000214518
hsa-miR-214-3p	ENSG00000214706
hsa-miR-214-3p	ENSG00000215041
hsa-miR-214-3p	ENSG00000215148
hsa-miR-214-3p	ENSG00000215182
hsa-miR-214-3p	ENSG00000215193
hsa-miR-214-3p	ENSG00000215454
hsa-miR-214-3p	ENSG00000215474
hsa-miR-214-3p	ENSG00000215883
hsa-miR-214-3p	ENSG00000221946
hsa-miR-214-3p	ENSG00000228300
hsa-miR-214-3p	ENSG00000233276
hsa-miR-214-3p	ENSG00000235194
hsa-miR-214-3p	ENSG00000237489
hsa-miR-214-3p	ENSG00000239382
hsa-miR-214-3p	ENSG00000239857
hsa-miR-214-3p	ENSG00000240403
hsa-miR-214-3p	ENSG00000240505
hsa-miR-214-3p	ENSG00000241233
hsa-miR-214-3p	ENSG00000241839
hsa-miR-214-3p	ENSG00000242019
hsa-miR-214-3p	ENSG00000242173
hsa-miR-214-3p	ENSG00000243156
hsa-miR-214-3p	ENSG00000243207
hsa-miR-214-3p	ENSG00000243364
hsa-miR-214-3p	ENSG00000243489
hsa-miR-214-3p	ENSG00000243649
hsa-miR-214-3p	ENSG00000243910
hsa-miR-214-3p	ENSG00000243989
hsa-miR-214-3p	ENSG00000244242
hsa-miR-214-3p	ENSG00000248099
hsa-miR-214-3p	ENSG00000248385
hsa-miR-214-3p	ENSG00000249242
hsa-miR-214-3p	ENSG00000249915
hsa-miR-214-3p	ENSG00000250151
hsa-miR-214-3p	ENSG00000250361
hsa-miR-214-3p	ENSG00000251322
hsa-miR-214-3p	ENSG00000255104
hsa-miR-214-3p	ENSG00000256053
hsa-miR-214-3p	ENSG00000256514
hsa-miR-214-3p	ENSG00000257008
hsa-miR-214-3p	ENSG00000257108
hsa-miR-214-3p	ENSG00000257704
hsa-miR-214-3p	ENSG00000258064
hsa-miR-214-3p	ENSG00000258691
hsa-miR-214-3p	ENSG00000258986
hsa-miR-214-3p	ENSG00000261456
hsa-miR-214-3p	ENSG00000262246
hsa-miR-214-3p	ENSG00000262526
hsa-miR-214-3p	ENSG00000262660
hsa-miR-214-3p	ENSG00000263429
hsa-miR-214-3p	ENSG00000264668
hsa-miR-214-3p	ENSG00000265190
hsa-miR-214-3p	ENSG00000265690
hsa-miR-214-3p	ENSG00000266714
hsa-miR-214-3p	ENSG00000267740
hsa-miR-214-3p	ENSG00000269404
hsa-miR-214-3p	ENSG00000270647
hsa-miR-214-3p	ENSG00000270885
hsa-miR-214-3p	ENSG00000271741
hsa-miR-214-3p	ENSG00000271824
hsa-miR-214-3p	ENSG00000272305
hsa-miR-214-3p	ENSG00000272896
hsa-miR-214-3p	ENSG00000275111
hsa-miR-214-3p	ENSG00000275410
hsa-miR-214-3p	ENSG00000275832
hsa-miR-214-3p	ENSG00000276234
hsa-miR-214-3p	ENSG00000277734
hsa-miR-214-3p	ENSG00000277971
hsa-miR-214-3p	ENSG00000278817
hsa-miR-214-3p	ENSG00000279073
hsa-miR-214-3p	ENSG00000280893
hsa-miR-214-3p	ENSG00000281106
hsa-miR-214-3p	ENSG00000281887
hsa-miR-214-3p	ENSG00000282034
hsa-miR-214-3p	ENSG00000283189
hsa-miR-214-3p	ENSG00000283288
hsa-miR-214-3p	ENSG00000284308
hsa-miR-214-3p	ENSG00000284917
hsa-miR-214-3p	ENSG00000284989
hsa-miR-214-3p	ENSG00000285437
hsa-miR-214-3p	ENSG00000286169
hsa-miR-214-3p	ENSG00000286905
hsa-miR-214-3p	ENSG00000287908
hsa-miR-21-5p	ENSG00000028528
hsa-miR-21-5p	ENSG00000108702
hsa-miR-21-5p	ENSG00000149970
hsa-miR-21-5p	ENSG00000158089
hsa-miR-21-5p	ENSG00000171763
hsa-miR-21-5p	ENSG00000197437
hsa-miR-223-5p	ENSG00000101958
hsa-miR-223-5p	ENSG00000139263
hsa-miR-223-5p	ENSG00000188493
hsa-miR-223-5p	ENSG00000198390
hsa-miR-223-5p	ENSG00000204628
hsa-miR-29b-3p	ENSG00000001460
hsa-miR-29b-3p	ENSG00000011105
hsa-miR-29b-3p	ENSG00000012232
hsa-miR-29b-3p	ENSG00000047346
hsa-miR-29b-3p	ENSG00000065268
hsa-miR-29b-3p	ENSG00000074266
hsa-miR-29b-3p	ENSG00000078043
hsa-miR-29b-3p	ENSG00000102243
hsa-miR-29b-3p	ENSG00000105251
hsa-miR-29b-3p	ENSG00000106305
hsa-miR-29b-3p	ENSG00000108465
hsa-miR-29b-3p	ENSG00000112984
hsa-miR-29b-3p	ENSG00000114859
hsa-miR-29b-3p	ENSG00000115866
hsa-miR-29b-3p	ENSG00000118960
hsa-miR-29b-3p	ENSG00000122783
hsa-miR-29b-3p	ENSG00000123609
hsa-miR-29b-3p	ENSG00000124092
hsa-miR-29b-3p	ENSG00000124588
hsa-miR-29b-3p	ENSG00000130035
hsa-miR-29b-3p	ENSG00000131051
hsa-miR-29b-3p	ENSG00000134986
hsa-miR-29b-3p	ENSG00000135930
hsa-miR-29b-3p	ENSG00000137831
hsa-miR-29b-3p	ENSG00000140694
hsa-miR-29b-3p	ENSG00000141627
hsa-miR-29b-3p	ENSG00000141837
hsa-miR-29b-3p	ENSG00000143006
hsa-miR-29b-3p	ENSG00000143494
hsa-miR-29b-3p	ENSG00000143622
hsa-miR-29b-3p	ENSG00000143624
hsa-miR-29b-3p	ENSG00000145088
hsa-miR-29b-3p	ENSG00000155508
hsa-miR-29b-3p	ENSG00000159210
hsa-miR-29b-3p	ENSG00000161013
hsa-miR-29b-3p	ENSG00000163293
hsa-miR-29b-3p	ENSG00000164120
hsa-miR-29b-3p	ENSG00000166199
hsa-miR-29b-3p	ENSG00000168237
hsa-miR-29b-3p	ENSG00000172345
hsa-miR-29b-3p	ENSG00000172757
hsa-miR-29b-3p	ENSG00000174483
hsa-miR-29b-3p	ENSG00000176894
hsa-miR-29b-3p	ENSG00000183049
hsa-miR-29b-3p	ENSG00000185090
hsa-miR-29b-3p	ENSG00000185345
hsa-miR-29b-3p	ENSG00000186583
hsa-miR-29b-3p	ENSG00000187231
hsa-miR-29b-3p	ENSG00000196569
hsa-miR-29b-3p	ENSG00000197375
hsa-miR-29b-3p	ENSG00000215440
hsa-miR-29b-3p	ENSG00000216937
hsa-miR-29b-3p	ENSG00000241563
hsa-miR-29b-3p	ENSG00000251503
hsa-miR-29b-3p	ENSG00000266714
hsa-miR-29b-3p	ENSG00000267314
hsa-miR-29b-3p	ENSG00000269307
hsa-miR-29b-3p	ENSG00000284922
hsa-miR-30a-3p	ENSG00000005075
hsa-miR-30a-3p	ENSG00000050426
hsa-miR-30a-3p	ENSG00000065054
hsa-miR-30a-3p	ENSG00000085117
hsa-miR-30a-3p	ENSG00000103534
hsa-miR-30a-3p	ENSG00000106692
hsa-miR-30a-3p	ENSG00000117640
hsa-miR-30a-3p	ENSG00000120727
hsa-miR-30a-3p	ENSG00000141338
hsa-miR-30a-3p	ENSG00000145191
hsa-miR-30a-3p	ENSG00000145626
hsa-miR-30a-3p	ENSG00000151718
hsa-miR-30a-3p	ENSG00000153339
hsa-miR-30a-3p	ENSG00000153786
hsa-miR-30a-3p	ENSG00000166986
hsa-miR-30a-3p	ENSG00000170703
hsa-miR-30a-3p	ENSG00000183317
hsa-miR-30a-3p	ENSG00000206053
hsa-miR-30a-3p	ENSG00000249715
hsa-miR-30a-3p	ENSG00000283703
hsa-miR-335-5p	ENSG00000163785
hsa-miR-335-5p	ENSG00000165609
hsa-miR-34c-5p	ENSG00000005844
hsa-miR-34c-5p	ENSG00000006071
hsa-miR-34c-5p	ENSG00000006282
hsa-miR-34c-5p	ENSG00000007038
hsa-miR-34c-5p	ENSG00000007541
hsa-miR-34c-5p	ENSG00000008382
hsa-miR-34c-5p	ENSG00000009780
hsa-miR-34c-5p	ENSG00000010310
hsa-miR-34c-5p	ENSG00000015475
hsa-miR-34c-5p	ENSG00000015532
hsa-miR-34c-5p	ENSG00000025434
hsa-miR-34c-5p	ENSG00000037280
hsa-miR-34c-5p	ENSG00000039650
hsa-miR-34c-5p	ENSG00000040531
hsa-miR-34c-5p	ENSG00000048342
hsa-miR-34c-5p	ENSG00000062822
hsa-miR-34c-5p	ENSG00000063761
hsa-miR-34c-5p	ENSG00000064205
hsa-miR-34c-5p	ENSG00000067836
hsa-miR-34c-5p	ENSG00000068489
hsa-miR-34c-5p	ENSG00000068831
hsa-miR-34c-5p	ENSG00000070010
hsa-miR-34c-5p	ENSG00000072952
hsa-miR-34c-5p	ENSG00000077463
hsa-miR-34c-5p	ENSG00000085274
hsa-miR-34c-5p	ENSG00000088682
hsa-miR-34c-5p	ENSG00000090512
hsa-miR-34c-5p	ENSG00000095319
hsa-miR-34c-5p	ENSG00000095539
hsa-miR-34c-5p	ENSG00000100150
hsa-miR-34c-5p	ENSG00000100201
hsa-miR-34c-5p	ENSG00000100284
hsa-miR-34c-5p	ENSG00000100321
hsa-miR-34c-5p	ENSG00000100354
hsa-miR-34c-5p	ENSG00000100726
hsa-miR-34c-5p	ENSG00000101463
hsa-miR-34c-5p	ENSG00000103066
hsa-miR-34c-5p	ENSG00000103174
hsa-miR-34c-5p	ENSG00000103175
hsa-miR-34c-5p	ENSG00000103335
hsa-miR-34c-5p	ENSG00000103356
hsa-miR-34c-5p	ENSG00000103485
hsa-miR-34c-5p	ENSG00000104731
hsa-miR-34c-5p	ENSG00000104783
hsa-miR-34c-5p	ENSG00000105556
hsa-miR-34c-5p	ENSG00000105939
hsa-miR-34c-5p	ENSG00000105953
hsa-miR-34c-5p	ENSG00000106477
hsa-miR-34c-5p	ENSG00000107281
hsa-miR-34c-5p	ENSG00000108469
hsa-miR-34c-5p	ENSG00000108852
hsa-miR-34c-5p	ENSG00000109111
hsa-miR-34c-5p	ENSG00000110442
hsa-miR-34c-5p	ENSG00000110719
hsa-miR-34c-5p	ENSG00000111348
hsa-miR-34c-5p	ENSG00000111361
hsa-miR-34c-5p	ENSG00000111641
hsa-miR-34c-5p	ENSG00000111684
hsa-miR-34c-5p	ENSG00000112038
hsa-miR-34c-5p	ENSG00000112041
hsa-miR-34c-5p	ENSG00000112578
hsa-miR-34c-5p	ENSG00000113494
hsa-miR-34c-5p	ENSG00000114786
hsa-miR-34c-5p	ENSG00000115194
hsa-miR-34c-5p	ENSG00000116205
hsa-miR-34c-5p	ENSG00000116299
hsa-miR-34c-5p	ENSG00000117298
hsa-miR-34c-5p	ENSG00000118495
hsa-miR-34c-5p	ENSG00000118707
hsa-miR-34c-5p	ENSG00000119681
hsa-miR-34c-5p	ENSG00000119782
hsa-miR-34c-5p	ENSG00000120341
hsa-miR-34c-5p	ENSG00000120949
hsa-miR-34c-5p	ENSG00000122515
hsa-miR-34c-5p	ENSG00000123453
hsa-miR-34c-5p	ENSG00000124120
hsa-miR-34c-5p	ENSG00000124155
hsa-miR-34c-5p	ENSG00000124194
hsa-miR-34c-5p	ENSG00000124532
hsa-miR-34c-5p	ENSG00000124733
hsa-miR-34c-5p	ENSG00000126231
hsa-miR-34c-5p	ENSG00000127054
hsa-miR-34c-5p	ENSG00000127527
hsa-miR-34c-5p	ENSG00000130244
hsa-miR-34c-5p	ENSG00000130545
hsa-miR-34c-5p	ENSG00000131095
hsa-miR-34c-5p	ENSG00000131653
hsa-miR-34c-5p	ENSG00000131748
hsa-miR-34c-5p	ENSG00000132286
hsa-miR-34c-5p	ENSG00000132376
hsa-miR-34c-5p	ENSG00000133612
hsa-miR-34c-5p	ENSG00000133731
hsa-miR-34c-5p	ENSG00000134020
hsa-miR-34c-5p	ENSG00000134072
hsa-miR-34c-5p	ENSG00000134369
hsa-miR-34c-5p	ENSG00000135426
hsa-miR-34c-5p	ENSG00000135632
hsa-miR-34c-5p	ENSG00000135722
hsa-miR-34c-5p	ENSG00000136011
hsa-miR-34c-5p	ENSG00000136098
hsa-miR-34c-5p	ENSG00000136448
hsa-miR-34c-5p	ENSG00000137078
hsa-miR-34c-5p	ENSG00000137500
hsa-miR-34c-5p	ENSG00000138073
hsa-miR-34c-5p	ENSG00000138685
hsa-miR-34c-5p	ENSG00000139178
hsa-miR-34c-5p	ENSG00000139631
hsa-miR-34c-5p	ENSG00000140400
hsa-miR-34c-5p	ENSG00000140534
hsa-miR-34c-5p	ENSG00000141298
hsa-miR-34c-5p	ENSG00000141503
hsa-miR-34c-5p	ENSG00000141552
hsa-miR-34c-5p	ENSG00000141736
hsa-miR-34c-5p	ENSG00000142634
hsa-miR-34c-5p	ENSG00000143367
hsa-miR-34c-5p	ENSG00000143434
hsa-miR-34c-5p	ENSG00000144485
hsa-miR-34c-5p	ENSG00000144559
hsa-miR-34c-5p	ENSG00000145103
hsa-miR-34c-5p	ENSG00000145247
hsa-miR-34c-5p	ENSG00000145506
hsa-miR-34c-5p	ENSG00000147099
hsa-miR-34c-5p	ENSG00000147394
hsa-miR-34c-5p	ENSG00000147443
hsa-miR-34c-5p	ENSG00000148985
hsa-miR-34c-5p	ENSG00000149091
hsa-miR-34c-5p	ENSG00000149357
hsa-miR-34c-5p	ENSG00000149582
hsa-miR-34c-5p	ENSG00000151164
hsa-miR-34c-5p	ENSG00000151474
hsa-miR-34c-5p	ENSG00000151572
hsa-miR-34c-5p	ENSG00000152234
hsa-miR-34c-5p	ENSG00000152292
hsa-miR-34c-5p	ENSG00000152910
hsa-miR-34c-5p	ENSG00000152969
hsa-miR-34c-5p	ENSG00000154263
hsa-miR-34c-5p	ENSG00000154928
hsa-miR-34c-5p	ENSG00000156150
hsa-miR-34c-5p	ENSG00000156398
hsa-miR-34c-5p	ENSG00000157349
hsa-miR-34c-5p	ENSG00000157873
hsa-miR-34c-5p	ENSG00000158816
hsa-miR-34c-5p	ENSG00000158985
hsa-miR-34c-5p	ENSG00000159128
hsa-miR-34c-5p	ENSG00000160050
hsa-miR-34c-5p	ENSG00000160087
hsa-miR-34c-5p	ENSG00000160256
hsa-miR-34c-5p	ENSG00000160563
hsa-miR-34c-5p	ENSG00000161010
hsa-miR-34c-5p	ENSG00000161179
hsa-miR-34c-5p	ENSG00000161249
hsa-miR-34c-5p	ENSG00000161677
hsa-miR-34c-5p	ENSG00000162572
hsa-miR-34c-5p	ENSG00000162736
hsa-miR-34c-5p	ENSG00000162882
hsa-miR-34c-5p	ENSG00000163013
hsa-miR-34c-5p	ENSG00000163235
hsa-miR-34c-5p	ENSG00000163395
hsa-miR-34c-5p	ENSG00000163702
hsa-miR-34c-5p	ENSG00000164053
hsa-miR-34c-5p	ENSG00000164483
hsa-miR-34c-5p	ENSG00000164904
hsa-miR-34c-5p	ENSG00000166143
hsa-miR-34c-5p	ENSG00000166289
hsa-miR-34c-5p	ENSG00000167004
hsa-miR-34c-5p	ENSG00000167601
hsa-miR-34c-5p	ENSG00000167925
hsa-miR-34c-5p	ENSG00000167965
hsa-miR-34c-5p	ENSG00000168038
hsa-miR-34c-5p	ENSG00000168255
hsa-miR-34c-5p	ENSG00000168334
hsa-miR-34c-5p	ENSG00000168397
hsa-miR-34c-5p	ENSG00000169131
hsa-miR-34c-5p	ENSG00000169247
hsa-miR-34c-5p	ENSG00000169660
hsa-miR-34c-5p	ENSG00000169727
hsa-miR-34c-5p	ENSG00000169951
hsa-miR-34c-5p	ENSG00000170426
hsa-miR-34c-5p	ENSG00000170464
hsa-miR-34c-5p	ENSG00000171132
hsa-miR-34c-5p	ENSG00000171307
hsa-miR-34c-5p	ENSG00000171314
hsa-miR-34c-5p	ENSG00000171346
hsa-miR-34c-5p	ENSG00000171819
hsa-miR-34c-5p	ENSG00000172613
hsa-miR-34c-5p	ENSG00000172689
hsa-miR-34c-5p	ENSG00000172725
hsa-miR-34c-5p	ENSG00000172977
hsa-miR-34c-5p	ENSG00000173137
hsa-miR-34c-5p	ENSG00000173193
hsa-miR-34c-5p	ENSG00000174137
hsa-miR-34c-5p	ENSG00000174951
hsa-miR-34c-5p	ENSG00000174996
hsa-miR-34c-5p	ENSG00000176531
hsa-miR-34c-5p	ENSG00000177301
hsa-miR-34c-5p	ENSG00000177570
hsa-miR-34c-5p	ENSG00000177731
hsa-miR-34c-5p	ENSG00000178927
hsa-miR-34c-5p	ENSG00000180176
hsa-miR-34c-5p	ENSG00000181666
hsa-miR-34c-5p	ENSG00000181894
hsa-miR-34c-5p	ENSG00000182199
hsa-miR-34c-5p	ENSG00000182511
hsa-miR-34c-5p	ENSG00000183134
hsa-miR-34c-5p	ENSG00000184281
hsa-miR-34c-5p	ENSG00000184911
hsa-miR-34c-5p	ENSG00000185000
hsa-miR-34c-5p	ENSG00000187024
hsa-miR-34c-5p	ENSG00000188338
hsa-miR-34c-5p	ENSG00000188517
hsa-miR-34c-5p	ENSG00000196405
hsa-miR-34c-5p	ENSG00000196497
hsa-miR-34c-5p	ENSG00000196535
hsa-miR-34c-5p	ENSG00000196565
hsa-miR-34c-5p	ENSG00000196693
hsa-miR-34c-5p	ENSG00000196923
hsa-miR-34c-5p	ENSG00000197093
hsa-miR-34c-5p	ENSG00000197136
hsa-miR-34c-5p	ENSG00000197483
hsa-miR-34c-5p	ENSG00000197766
hsa-miR-34c-5p	ENSG00000198033
hsa-miR-34c-5p	ENSG00000198792
hsa-miR-34c-5p	ENSG00000198816
hsa-miR-34c-5p	ENSG00000198854
hsa-miR-34c-5p	ENSG00000203485
hsa-miR-34c-5p	ENSG00000203784
hsa-miR-34c-5p	ENSG00000205639
hsa-miR-34c-5p	ENSG00000211452
hsa-miR-34c-5p	ENSG00000211455
hsa-miR-34c-5p	ENSG00000213445
hsa-miR-34c-5p	ENSG00000213809
hsa-miR-34c-5p	ENSG00000214050
hsa-miR-34c-5p	ENSG00000231925
hsa-miR-34c-5p	ENSG00000234409
hsa-miR-34c-5p	ENSG00000240053
hsa-miR-34c-5p	ENSG00000241322
hsa-miR-34c-5p	ENSG00000242114
hsa-miR-34c-5p	ENSG00000242441
hsa-miR-34c-5p	ENSG00000243207
hsa-miR-34c-5p	ENSG00000250571
hsa-miR-34c-5p	ENSG00000253368
hsa-miR-34c-5p	ENSG00000254986
hsa-miR-34c-5p	ENSG00000255582
hsa-miR-34c-5p	ENSG00000257008
hsa-miR-34c-5p	ENSG00000259431
hsa-miR-34c-5p	ENSG00000265690
hsa-miR-34c-5p	ENSG00000269335
hsa-miR-34c-5p	ENSG00000276017
hsa-miR-34c-5p	ENSG00000278633
hsa-miR-34c-5p	ENSG00000285043
hsa-miR-34c-5p	ENSG00000285238
hsa-miR-34c-5p	ENSG00000285269
hsa-miR-3615	ENSG00000004399
hsa-miR-3615	ENSG00000004534
hsa-miR-3615	ENSG00000004897
hsa-miR-3615	ENSG00000006283
hsa-miR-3615	ENSG00000006788
hsa-miR-3615	ENSG00000007264
hsa-miR-3615	ENSG00000007392
hsa-miR-3615	ENSG00000007516
hsa-miR-3615	ENSG00000011332
hsa-miR-3615	ENSG00000011451
hsa-miR-3615	ENSG00000013619
hsa-miR-3615	ENSG00000026297
hsa-miR-3615	ENSG00000037280
hsa-miR-3615	ENSG00000041988
hsa-miR-3615	ENSG00000054598
hsa-miR-3615	ENSG00000056998
hsa-miR-3615	ENSG00000059691
hsa-miR-3615	ENSG00000059915
hsa-miR-3615	ENSG00000063515
hsa-miR-3615	ENSG00000064195
hsa-miR-3615	ENSG00000064961
hsa-miR-3615	ENSG00000066468
hsa-miR-3615	ENSG00000066629
hsa-miR-3615	ENSG00000066923
hsa-miR-3615	ENSG00000068354
hsa-miR-3615	ENSG00000069011
hsa-miR-3615	ENSG00000070778
hsa-miR-3615	ENSG00000071655
hsa-miR-3615	ENSG00000072609
hsa-miR-3615	ENSG00000072778
hsa-miR-3615	ENSG00000072952
hsa-miR-3615	ENSG00000073150
hsa-miR-3615	ENSG00000074755
hsa-miR-3615	ENSG00000074964
hsa-miR-3615	ENSG00000075240
hsa-miR-3615	ENSG00000075790
hsa-miR-3615	ENSG00000076248
hsa-miR-3615	ENSG00000076864
hsa-miR-3615	ENSG00000076928
hsa-miR-3615	ENSG00000079337
hsa-miR-3615	ENSG00000080503
hsa-miR-3615	ENSG00000080845
hsa-miR-3615	ENSG00000081189
hsa-miR-3615	ENSG00000081692
hsa-miR-3615	ENSG00000083828
hsa-miR-3615	ENSG00000087085
hsa-miR-3615	ENSG00000087088
hsa-miR-3615	ENSG00000088543
hsa-miR-3615	ENSG00000088836
hsa-miR-3615	ENSG00000089116
hsa-miR-3615	ENSG00000091073
hsa-miR-3615	ENSG00000097007
hsa-miR-3615	ENSG00000099617
hsa-miR-3615	ENSG00000099783
hsa-miR-3615	ENSG00000099822
hsa-miR-3615	ENSG00000099849
hsa-miR-3615	ENSG00000099960
hsa-miR-3615	ENSG00000100034
hsa-miR-3615	ENSG00000100036
hsa-miR-3615	ENSG00000100077
hsa-miR-3615	ENSG00000100280
hsa-miR-3615	ENSG00000100330
hsa-miR-3615	ENSG00000100364
hsa-miR-3615	ENSG00000100949
hsa-miR-3615	ENSG00000101199
hsa-miR-3615	ENSG00000101203
hsa-miR-3615	ENSG00000101236
hsa-miR-3615	ENSG00000101986
hsa-miR-3615	ENSG00000102984
hsa-miR-3615	ENSG00000103051
hsa-miR-3615	ENSG00000103227
hsa-miR-3615	ENSG00000103248
hsa-miR-3615	ENSG00000103335
hsa-miR-3615	ENSG00000104805
hsa-miR-3615	ENSG00000104833
hsa-miR-3615	ENSG00000104884
hsa-miR-3615	ENSG00000105287
hsa-miR-3615	ENSG00000105656
hsa-miR-3615	ENSG00000105676
hsa-miR-3615	ENSG00000106624
hsa-miR-3615	ENSG00000107331
hsa-miR-3615	ENSG00000107807
hsa-miR-3615	ENSG00000108262
hsa-miR-3615	ENSG00000108946
hsa-miR-3615	ENSG00000109323
hsa-miR-3615	ENSG00000109794
hsa-miR-3615	ENSG00000110057
hsa-miR-3615	ENSG00000112118
hsa-miR-3615	ENSG00000112238
hsa-miR-3615	ENSG00000113448
hsa-miR-3615	ENSG00000113716
hsa-miR-3615	ENSG00000115155
hsa-miR-3615	ENSG00000115286
hsa-miR-3615	ENSG00000115297
hsa-miR-3615	ENSG00000115677
hsa-miR-3615	ENSG00000115884
hsa-miR-3615	ENSG00000116580
hsa-miR-3615	ENSG00000116584
hsa-miR-3615	ENSG00000121289
hsa-miR-3615	ENSG00000122390
hsa-miR-3615	ENSG00000122783
hsa-miR-3615	ENSG00000122965
hsa-miR-3615	ENSG00000123689
hsa-miR-3615	ENSG00000124104
hsa-miR-3615	ENSG00000124126
hsa-miR-3615	ENSG00000124140
hsa-miR-3615	ENSG00000125445
hsa-miR-3615	ENSG00000125458
hsa-miR-3615	ENSG00000125730
hsa-miR-3615	ENSG00000125843
hsa-miR-3615	ENSG00000125844
hsa-miR-3615	ENSG00000126062
hsa-miR-3615	ENSG00000127080
hsa-miR-3615	ENSG00000127152
hsa-miR-3615	ENSG00000127585
hsa-miR-3615	ENSG00000128594
hsa-miR-3615	ENSG00000128973
hsa-miR-3615	ENSG00000129749
[truncated: 1,009 more rows]
