# Supplementary material for: Differential expression of miRNAs revealed by small RNA sequencing in traumatic tracheal stenosis
Source: Front Genet. 2024 Jan 8;14:1291488. doi: 10.3389/fgene.2023.1291488 (PMC10800880; doi:10.3389/fgene.2023.1291488)
Supplement: Supplementary file 2 [file Table3.XLSX]

## Sheet: Table S3
Table S3 The results of Go Enrichment analysis of biological processes (top 10)
GO clauses and subclauses	Type	Biological function	Corrected P-value	Gene number
GO:0044699	BP	single-organism process	4.06e-08	1974
GO:0044710	BP	single-organism metabolic process	2.94e-06	907
GO:0044763	BP	single-organism cellular process	2.18e-05	1823
GO:0006996	BP	organelle organization	4.4e-05	567
GO:0010646	BP	regulation of cell communication	0.000101	528
GO:0007399	BP	nervous system development	0.000124	357
GO:0023051	BP	regulation of signaling	0.000125	522
GO:0043085	BP	positive regulation of catalytic activity	0.001264	232
GO:0051649	BP	establishment of localization in cell	0.001264	506
GO:0055114	BP	oxidation-reduction process	0.002811	172
