# Supplementary material for: Differential expression of miRNAs revealed by small RNA sequencing in traumatic tracheal stenosis
Source: Front Genet. 2024 Jan 8;14:1291488. doi: 10.3389/fgene.2023.1291488 (PMC10800880; doi:10.3389/fgene.2023.1291488)
Supplement: Supplementary file 3 [file Table6.XLSX]

## Sheet: Table S6
Table S6 The signal pathway of candidate target gene KEGG enrichment
Signaling pathway	Enrichment factor	Gene number
Wnt signaling pathway	0.107	15
Cell cycle	0.113	14
Toll-like receptor signaling pathway	0.132	14
MAPK signaling pathway	0.128	33
TNF signaling pathway	0.136	15
Notch signaling pathway	0.146	7
Jak-STAT signaling pathway	0.147	23
PI3K-Akt signaling pathway	0.147	51
VEGF signaling pathway	0.164	10
Regulation of actin cytoskeleton	0.158	34
Apoptosis	0.174	15
HIF-1 signaling pathway	0.179	19
Inflammatory mediator regulation of TRP channels	0.182	18
NF-kappa B signaling pathway	0.187	17
PPAR signaling pathway	0.203	14
p53 signaling pathway	0.206	14
Ras signaling pathway	0.175	40
mTOR signaling pathway	0.233	14
Phosphatidylinositol signaling system	0.222	18
Rap1 signaling pathway	0.194	41
