# Supplementary material for: Differential expression of miRNAs revealed by small RNA sequencing in traumatic tracheal stenosis
Source: Front Genet. 2024 Jan 8;14:1291488. doi: 10.3389/fgene.2023.1291488 (PMC10800880; doi:10.3389/fgene.2023.1291488)
Supplement: Supplementary file 4 [file Table4.XLSX]

## Sheet: Table S4
Table S4 The results of Go Enrichment analysis of cellular component (top 10)
GO clauses and subclauses	Type	Cell composition fraction	Corrected P-value	Gene number
GO:0005737	CC	cytoplasm	1.09e-23	1692
GO:0044424	CC	intracellular part	1.58e-19	2009
GO:0005622	CC	intracellular	2.49e-19	2013
GO:0044444	CC	cytoplasmic part	9.36e-14	1417
GO:0043226	CC	Organelle	1.57e-12	1867
GO:0043229	CC	intracellular organelle	3.21e-10	1766
GO:0044422	CC	organelle part	6.04e-09	1375
GO:0044446	CC	intracellular organelle part	1.42e-08	1344
GO:0043227	CC	membrane-bounded organelle	4.06e-08	1693
GO:0005623	CC	cell	1.69e-07	2229
