# Supplementary material for: Differential expression of miRNAs revealed by small RNA sequencing in traumatic tracheal stenosis
Source: Front Genet. 2024 Jan 8;14:1291488. doi: 10.3389/fgene.2023.1291488 (PMC10800880; doi:10.3389/fgene.2023.1291488)
Supplement: Supplementary file 5 [file Table1.XLSX]

## Sheet: table S1
Table S1 The significant differential expression of miRNA expression
miRNA	Number of sequences in the TTS group	Number of sequence in the control group	log2Fold Change	The expression situation	padj
hsa-miR-450b-5p	240.122	20.6311	3.0232	Up-regulation	0.00372
hsa-miR-450a-5p	462.738	44.4385	2.8827	Up-regulation	0.006565
hsa-miR-223-5p	434.942	38.6449	2.6565	Up-regulation	0.043831
hsa-miR-493-3p	1703.29	231.445	2.6087	Up-regulation	0.002881
hsa-miR-409-5p	186.662	22.146	2.4941	Up-regulation	0.037988
hsa-miR-493-5p	1376.27	166.872	2.4808	Up-regulation	0.037988
hsa-miR-21-5p	936205	158901	2.3328	Up-regulation	0.006565
hsa-miR-379-5p	7066.31	1149.86	2.3144	Up-regulation	0.022945
hsa-miR-134-5p	1070.31	184.584	2.1988	Up-regulation	0.037988
hsa-miR-409-3p	2395.27	518.699	2.0463	Up-regulation	0.009862
hsa-miR-382-5p	1192.89	290.182	1.8532	Up-regulation	0.037988
hsa-miR-214-3p	1330.41	386.674	1.6655	Up-regulation	0.032949
hsa-miR-381-3p	8295.86	3359.33	1.2611	Up-regulation	0.02377
hsa-miR-29b-3p	531.46	1492.52	-1.4124	Down regulation	0.039422
hsa-miR-30a-3p	302.369	1067.09	-1.71	Down regulation	0.022945
hsa-miR-195-5p	268.161	1393.23	-2.1032	Down regulation	0.035298
hsa-miR-200a-3p	2506.82	13765	-2.1829	Down regulation	0.024783
hsa-miR-141-3p	174.938	1493.14	-2.4752	Down regulation	0.044972
hsa-miR-200a-5p	581.707	5850.59	-2.6499	Down regulation	0.035298
hsa-miR-3615	33.0364	402.547	-2.8331	Down regulation	0.024783
hsa-miR-34c-5p	5202.62	50987.1	-2.9066	Down regulation	0.002881
hsa-miR-375-3p	658.768	9008.22	-2.9382	Down regulation	0.022945
hsa-miR-449c-5p	39.9913	946.098	-3.3079	Down regulation	0.016187
hsa-miR-335-5p	20.8772	351.94	-3.3751	Down regulation	0.002881
Note：log2FoldChange：Log of fold change between two groups at bottom 2；padj：Corrected P-value
