# Supplementary material for: Differential expression of miRNAs revealed by small RNA sequencing in traumatic tracheal stenosis
Source: Front Genet. 2024 Jan 8;14:1291488. doi: 10.3389/fgene.2023.1291488 (PMC10800880; doi:10.3389/fgene.2023.1291488)
Supplement: Supplementary file 6 [file Table5.XLSX]

## Sheet: Table S5
Table S5 The results of Go Enrichment analysis of molecular function (top 10)
GO clauses and subclauses	Type	Molecular function	Corrected P-value	Gene number
GO:0003824	MF	catalytic activity	4.11e-11	908
GO:0005515	MF	protein binding	4.88e-09	1730
GO:0008092	MF	cytoskeletal protein binding	4.05e-06	181
GO:0000166	MF	nucleotide binding	6.92e-06	360
GO:1901265	MF	nucleoside phosphate binding	6.92e-06	360
GO:0043168	MF	anion binding	6.92e-06	454
GO:0036094	MF	small molecule binding	1.32e-05	410
GO:0003674	MF	molecular_function	2.87e-05	2324
GO:0005488	MF	binding	4.37e-05	2060
GO:0019899	MF	enzyme binding	0.000124	325
