# Supplementary material for: Differential expression of miRNAs revealed by small RNA sequencing in traumatic tracheal stenosis
Source: Front Genet. 2024 Jan 8;14:1291488. doi: 10.3389/fgene.2023.1291488 (PMC10800880; doi:10.3389/fgene.2023.1291488)
Supplement: Supplementary file 7 [file Table7.XLSX]

## Sheet: Supplementary Table 7
Supplementary Table 7 The information of TTS and normal control patients
Patients	Sex	Age	Diagnose
TTS1	Male	66	Tracheal stenosis after intubation
TTS2	Male	44	Tracheal stenosis after intubation
TTS3	Female	59	Tracheal stenosis after intubation
TTS4	Male	54	Tracheal stenosis after intubation
TTS5	Male	66	Tracheal stenosis after intubation
TTS6	Female	65	Post-tracheotomy stenosis
TTS7	Female	61	Post-tracheotomy stenosis
TTS8	Female	27	Post-tracheotomy stenosis
control1	Female	57	Lung adenocarcinoma
control2	Male	74	Lung adenocarcinoma
control3	Female	54	Lung squamous cell carcinoma
control4	Male	51	Lung adenocarcinoma
control5	Male	72	Lung squamous cell carcinoma
control6	Female	45	Lung adenocarcinoma
control7	Male	58	Lung squamous cell carcinoma
control8	Female	51	Lung adenocarcinoma
