# Supplementary material for: Differential expression of miRNAs revealed by small RNA sequencing in traumatic tracheal stenosis
Source: Front Genet. 2024 Jan 8;14:1291488. doi: 10.3389/fgene.2023.1291488 (PMC10800880; doi:10.3389/fgene.2023.1291488)
Supplement: Supplementary file 8 [file Table8.XLSX]

## Sheet: Sheet1 (2)
miRNA
miR-29
	△CT	△△CT(△CT-CON3)	2^-△△CT	Statistical method	P value
CON1	7.52039	0.833297	0.561245	Mann-Whitney U	0.0148
CON2	7.51142	0.824334	0.564743
CON3	6.68709	0	1
CON4	7.01104	0.323947	0.798881
CON5	4.97082	-1.71627	3.28585
CON6	5.041	-1.64609	3.12984
CON7	8.36761	1.68052	0.31197
CON8	5.71592	-0.971166	1.96042
TTS1	8.12524	1.43814	0.369042
TTS2	5.98512	-0.701967	1.62672
TTS3	7.42256	0.735473	0.600621
TTS4	8.38057	1.69348	0.30918
TTS5	9.50874	2.82165	0.141449
TTS6	8.66348	1.97639	0.254126
TTS7	8.72427	2.03718	0.243639
TTS8	8.36819	1.6811	0.311844
miR-21
	△CT	△△CT(△CT-CON4)	2^-△△CT	Statistical method	P value
CON1	2.21259	1.11429	0.461917	Mann-Whitney U	0.0104
CON2	2.68841	1.59011	0.332145
CON3	0.756839	-0.341458	1.26704
CON4	1.0983	0	1
CON5	-1.25228	-2.35058	5.10029
CON6	-2.04223	-3.14052	8.81845
CON7	1.21129	0.112991	0.924669
CON8	2.1356	1.0373	0.487237
TTS1	0.0150067	-1.08329	2.11886
TTS2	-0.0122026	-1.1105	2.1592
TTS3	-3.71295	-4.81125	28.0757
TTS4	-2.36528	-3.46358	11.0316
TTS5	-2.51823	-3.61653	12.2655
TTS6	-1.25503	-2.35333	5.11003
TTS7	-1.92117	-3.01947	8.1087
TTS8	0.681199	-0.417097	1.33524
miR-214
	△CT	△△CT(△CT-CON1)	2^-△△CT	Statistical method	P value
CON1	4.62277	0	1	Mann-Whitney U	0.0003
CON2	2.40029	-2.22248	4.66694
CON3	3.26572	-1.35705	2.5616
CON4	5.38643	0.763665	0.588998
CON5	7.83321	3.21045	0.108034
CON6	3.87687	-0.745897	1.67702
CON7	3.03792	-1.58485	2.99976
CON8	2.94672	-1.67605	3.19551
TTS1	1.03048	-3.59228	12.061
TTS2	0.318992	-4.30377	19.7499
TTS3	0.0154101	-4.60736	24.3754
TTS4	-0.377249	-5.00002	32.0003
TTS5	0.255346	-4.36742	20.6407
TTS6	-0.527408	-5.15017	35.5105
TTS7	2.63144	-1.99132	3.97602
TTS8	2.31569	-2.30707	4.94878
miR-141
	△CT	△△CT(△CT-CON1)	2^-△△CT	Statistical method	P value
CON1	6.49776	0	1	Mann-Whitney U	0.0281
CON2	4.6965	-1.80126	3.48526
CON3	5.72165	-0.776116	1.71251
CON4	5.33044	-1.16733	2.24595
CON5	6.27874	-0.219024	1.16395
CON6	7.63005	1.13228	0.456193
CON7	3.80866	-2.68911	6.44915
CON8	6.29198	-0.205782	1.15331
TTS1	6.63069	0.132921	0.911983
TTS2	8.77172	2.27396	0.206762
TTS3	8.63187	2.13411	0.227808
TTS4	7.85994	1.36217	0.388996
TTS5	4.84184	-1.65592	3.15125
TTS6	6.20081	-0.296954	1.22855
TTS7	8.12542	1.62766	0.323613
TTS8	7.8905	1.39274	0.380841
